# Supplementary material
Source: HighWire-hosted journal article supplement (https://www.cmajopen.ca/highwire/filestream/81416/field_highwire_adjunct_files/1/2019-0112-original-submission.pdf)
Supplement: 2019-0112-original-submission.pdf [file 2019-0112-original-submission.pdf]

**Full title:**

Opioid losses in terms of dosage and cost: a retrospective analysis of Health Canada data

**Authors**

Mark Fan, BSc, MHSc<sup>a</sup>,  
Dorothy Tscheng, BScPhm, CGP<sup>b</sup>,  
Michael Hamilton, MD, MPH<sup>b</sup>,  
Patricia Trbovich, PhD<sup>a,c</sup>

**Author Affiliations**

<sup>a</sup>HumanEra, Office of Research and Innovation, North York General Hospital, 4001 Leslie Street, LE-140, Toronto, ON, Canada, M2K 1E1

<sup>b</sup>Institute for Safe Medication Practices Canada, 4711 Yonge Street, Suite 501, Toronto, ON, Canada, M2N 6K8

<sup>c</sup>Institute of Health Policy, Management and Evaluation, University of Toronto, Health Sciences Building, 155 College Street, Suite 425, Toronto, ON, Canada, M5T 3M6

**Author Email Addresses**

Dorothy Tscheng ([dorothy.tscheng@ismpcanada.ca](mailto:dorothy.tscheng@ismpcanada.ca))  
Michael Hamilton ([michael.hamilton@ismpcanada.ca](mailto:michael.hamilton@ismpcanada.ca))  
Patricia Trbovich ([patricia.trbovich@utoronto.ca](mailto:patricia.trbovich@utoronto.ca))

**Corresponding Author**

Mark Fan ([mark.fan@nygh.on.ca](mailto:mark.fan@nygh.on.ca))  
Office of Research and Innovation  
North York General Hospital  
4001 Leslie Street, LE-140  
Toronto, ON Canada  
M2K 1E1  
Phone: 416-756-6000 x3075

**Disclosure and Funding Statement**

This work was supported by Becton Dickinson (BD) Canada Inc. [grant #ROR2017-04260JH-NYGH]. BD Canada had no involvement in study design; in the collection, analysis or interpretation of data; in the writing of the report; or in the decision to submit the article for publication.

Mark Fan and Patricia Trbovich have received honoraria from BD Canada for presenting preliminary study findings at BD sponsored events. All other co-authors have no disclosures to report.

**Contributor's Statement**

All authors contributed substantially to the conception, design, and analysis of the study, and all drafted and revised the article and give final approval for publication. All authors agree to act as guarantors of the work to ensure questions related to the work are appropriately investigated and resolved.

**Title:**

Opioid losses in terms of dosage and cost: a retrospective analysis of Health Canada data

**Abstract**

**Background:** Despite increasing opioid-related mortality, there has been no analysis of opioids lost from healthcare facilities (i.e., community pharmacies, companies, and hospitals). We analyzed opioid losses reported to Health Canada (HC) to identify the amount missing, the distribution of losses between types of facilities, and the direct costs of the lost opioids. Additionally, we compared losses as measured in milligrams, 'dosage units', or 'incidents', to identify how they may lead to different trends and interpretations.

**Methods:** We calculated milligrams of drug lost from 5.75 years of HC data, restricting our analysis to codeine, fentanyl, hydromorphone, morphine and oxycodone. We converted the lost milligrams into oral morphine equivalents, daily defined doses, approximate wholesale value, and approximate street value.

**Results:** Over 112 kilograms of opioids were lost, an estimated \$8.7 million in wholesale cost or \$136 million in street value. Unexplained losses were common, but each facility type had other dominant loss categories: armed robberies and break and enter (community pharmacies), losses in transit (companies), and pilferage (hospitals). Loss trends over 5.75 years varied by reporting unit and facility type: community pharmacy losses increased (dosage units, incidents) or remained stable (milligrams); hospital losses increased (milligrams) or showed no

1  
2  
3 clear trend (dosage units, incidents); companies showed no clear loss trend from  
4  
5 any reporting metric.  
6

7  
8 **Interpretation:** Large quantities of opioids are going missing and cost healthcare  
9  
10 facilities millions of dollars. Controlled drug losses should be reported in milligrams  
11  
12 instead of 'dosage units' so that differences in drug strength are accounted for when  
13  
14 assessing trends.  
15  
16

## 17 18 **Introduction**

19  
20 In recent years, there has been an increasing recognition of drug theft or loss  
21  
22 from hospitals<sup>1-5</sup> and community pharmacies.<sup>6,7</sup> Healthcare facilities bear the cost of  
23  
24 medications diverted from their stock. For example, in 2018, hospitals were fined in  
25  
26 excess of \$4 million to address inadequate safeguards.<sup>8</sup> Drug thefts cost healthcare  
27  
28 facilities in investigations, care for affected patients, and reputation-related  
29  
30 damages.<sup>9,10</sup> Furthermore, losses from healthcare facilities may have the potential to  
31  
32 increase illegal supply of opioids via trafficking. While data from the US Drug  
33  
34 Enforcement Agency (DEA) has reported on opioid losses from healthcare  
35  
36 institutions (e.g., community pharmacies, hospitals),<sup>11,12</sup> we are unaware of any  
37  
38 similar peer-reviewed or government-sponsored analyses based on Health Canada  
39  
40 data.  
41  
42  
43  
44  
45

46 Health Canada (HC) maintains a database of lost opioids from Canadian  
47  
48 facilities that are mandated to report opioid losses to HC within 10 days.<sup>13</sup> Several  
49  
50 news outlets have used HC data to report the losses as measured in 'dosage  
51  
52 units'<sup>14,15</sup> or as measured in 'incidents of loss',<sup>16</sup> both of which have important  
53  
54 limitations that may not be widely understood. Dosage units indiscriminately count  
55  
56  
57  
58

1  
2  
3 tablets, vials, and packages as if the losses were equivalent. For example, a 'dosage  
4 unit' could refer to the loss of 1 tablet or the loss of 1 bottle containing 500 tablets.  
5  
6  
7  
8 'Incidents of loss' refers to the number of line items in the HC data and could be  
9  
10 impacted based on reporting frequency. For example, hospital A may discover an  
11  
12 opioid that has been lost several times in the last 2 weeks and generate a single  
13  
14 report, whereas hospital B might notice these losses regularly and report after each  
15  
16 occurrence. As a result, hospital B would have more 'incidents of lost opioid' even  
17  
18 though their total losses of the drug might be smaller. Therefore, losses as measured  
19  
20 in 'dosage units' or 'incidents' do not support comparative analyses (e.g., differences  
21  
22 year to year or between institutions).  
23  
24  
25

26  
27 Reporting opioid losses in 'dosage units' is a phenomenon that extends  
28  
29 beyond Canada. In the US, losses of opioids from healthcare facilities are captured in  
30  
31 the DEA's Drug Theft and Loss database. A 2018 DEA report identifies 97.5 million  
32  
33 dosage units of lost opioids between 2010 to 2017.<sup>12</sup> Given that both Canadian and  
34  
35 US reports of opioid losses are based on 'dosage units', policy makers have not yet  
36  
37 had reliable data to accurately assess or compare losses year to year, nor can they  
38  
39 accurately estimate costs of the lost drug based on dosage units alone.  
40  
41  
42

43 To rectify this situation, we analyzed HC data to 1) estimate actual milligram  
44  
45 losses for five common opioids, and used this to estimate the approximate  
46  
47 wholesale and street value of lost opioids in Canada, 2) compare losses, and reason  
48  
49 for loss, by facility type, and 3) compare opioid loss trends as measured by  
50  
51 milligrams, dosage units, and incidents of loss to determine whether they suggest  
52  
53  
54  
55  
56  
57  
58  
59  
60

1  
2  
3 different interpretations, and to select the metric that best represents quantity and  
4  
5 cost of lost opioids.  
6  
7

## 8 **Methods**

### 9 Data Source

10  
11  
12  
13 HC data on controlled drug losses is currently only accessible on request via  
14  
15 Access to Information (ATI) legislation, a process which has been criticized for lack  
16  
17 of timeliness.<sup>17</sup> In June 2018, CBC News published HC data from an ATI request for  
18  
19 all controlled drug losses between January 1, 2012 to September 30, 2017.<sup>18,19</sup> This  
20  
21 is the largest release we are aware of and is therefore valuable for assessing trends  
22  
23 in Canadian healthcare sources. Pilot work by the authors suggests that HC data  
24  
25 represents the best source of data on the incidence of Canadian drug losses (see  
26  
27 Appendix).  
28  
29  
30  
31

### 32 Inclusion Criteria and Constraints

33  
34  
35 We limited our analysis to the most commonly dispensed opioids in Canada  
36  
37 based on data from the Canadian Institutes of Health Information<sup>20</sup>: codeine,  
38  
39 fentanyl, hydromorphone, morphine, and oxycodone. Tramadol is among the 6 most  
40  
41 dispensed opioids in Canada,<sup>20</sup> but is not yet classified as a controlled substance,<sup>21</sup>  
42  
43 so no loss reports were captured for this drug.  
44  
45  
46

### 47 Data Analysis

48  
49  
50 HC data states a numeric 'quantity' lost for each line item, but the 'unit code'  
51  
52 (e.g., millilitres, tablets, patches) for each report varies. We used this information to  
53  
54 manually calculate the milligrams lost for every reported drug loss. We then used  
55  
56  
57  
58

1  
2  
3 the milligrams lost to calculate oral morphine equivalents (OMEQ) and daily defined  
4 doses (DDD) (see Appendix for conversion factors).  
5  
6

7  
8 We deliberately used the lowest estimate of loss for ambiguous reports. For  
9  
10 example, one report lists the loss of 728 ‘packages’ of Hydromorphone HP  
11  
12 50mg/mL. From the dataset, it is unclear whether these containers were 1mL, 5mL,  
13  
14 10mL, or 50 mL (each coming in boxes of various sizes). In this case, the smallest  
15  
16 available package per the drug product monographs found on Health Canada’s Drug  
17  
18 Product Database<sup>22</sup> is a box of 10, 1mL vials.  
19  
20

### 21 22 [Wholesale and Street Drug Costing](#)

23  
24  
25 Approximate wholesale costs were calculated from the Ontario Drug Benefit  
26  
27 (ODB) database for the entire dataset because Ontario lost the most OMEQs of all  
28  
29 provinces. If the cost was not available from ODB, other provincial formularies were  
30  
31 searched (see Supplemental file for wholesale pricing information). While street  
32  
33 value fluctuates<sup>23,24</sup> depending on cycles of supply and demand, geography, and  
34  
35 drug strength, we used a single point-in-time street value based on information  
36  
37 from the Ontario Provincial Police and literature (see Appendix).  
38  
39  
40

### 41 42 **Results**

43  
44  
45 An analysis of all 64,964 loss reports determined that the cumulative loss of  
46  
47 codeine, fentanyl, hydromorphone, morphine and oxycodone in the timeframe of  
48  
49 January 2012 to September 2017 was over 112 kilograms (Table 1). This equates to  
50  
51 approximately \$8.7 million in wholesale costs and \$136 million if all lost drugs were  
52  
53 resold on the street.  
54  
55  
56  
57  
58

1  
2  
3 <Table 1>  
4

5 Community pharmacies, companies, and hospitals are responsible for nearly  
6 all losses, comprising 76.8%, 17.1% and 6% of lost OMEQs, respectively (Table 2).  
7  
8 As a result, we focused all subsequent analyses on these three facility types.  
9  
10

11  
12 <Table 2>  
13

14 The dominant reasons for loss (in milligrams) varies by facility type (Table  
15 3). Community pharmacy losses are primarily from armed robberies (31.1%), break  
16 and entry (28.1%), unexplained losses (17.6%), and pilferage (15.5%). Company  
17 losses are primarily from unexplained losses (55.8%) and losses in transit (30.7%).  
18  
19 Hospitals are primarily affected by pilferage (57.4%) and unexplained losses  
20 (33.4%). More detailed breakdowns of loss trends by province or territory for  
21 community pharmacies and hospitals show that British Columbia (BC) has made  
22 significant reductions in community pharmacy losses over time, whereas Ontario  
23 hospitals report an increasing amount of pilferage losses in recent years (see  
24 Appendix sections 5 and 6).  
25  
26  
27  
28  
29  
30  
31  
32  
33  
34  
35  
36  
37

38 <Table 3>  
39

40 Reporting milligrams of lost opioids shows different trends than when  
41 reporting dosage units, or number of 'incidents of loss' (Table 4). Specifically, the  
42 incidents of loss and dosage units lost from community pharmacies have steadily  
43 increased since 2012, but milligram losses have not. Conversely, hospitals show  
44 increased milligram losses in recent years, whereas line items and dosage units do  
45 not show the same trend. There is no clear trend discernable from any of these  
46 metrics for companies. See Appendix section 7 for a visual depiction of trends.  
47  
48  
49  
50  
51  
52  
53  
54  
55  
56  
57  
58  
59  
60

1  
2  
3 <Table 4>  
4  
5

### 6 Interpretation 7

8 We found Canadian facilities lost an annual average of 19.6 kilograms of five  
9 common opioids; this equates to an annual value of approximately \$23.7 million in  
10 street value. Community pharmacies were the largest contributor to the losses,  
11 followed by companies and hospitals. Unexplained losses were a major category of  
12 loss in all facility types, but each facility type was also particularly susceptible to  
13 certain types of loss: community pharmacies were most susceptible to armed  
14 robbery and break and enter, hospitals faced a high rate of pilferage, and companies  
15 experienced a high proportion of drug losses in transit. Our analysis also showed  
16 that community pharmacy losses remained stable over time as measured by dose  
17 (i.e., milligrams), but loss rates appeared to be increasing when measured by dosage  
18 units or incidents of loss. Opioid losses from hospitals are increasing when  
19 measured in dose, but a clear trend is not visible when measured by dosage units or  
20 incidents of loss. Based on this data, we suggest that losses as measured by dosage  
21 units or incidents of loss can mischaracterize the severity of the opioid loss; a dose  
22 based metric (e.g., milligrams, OMEQs) provides a more accurate means of assessing  
23 loss trends over time within and between facility types or provinces.  
24  
25  
26  
27  
28  
29  
30  
31  
32  
33  
34  
35  
36  
37  
38  
39  
40  
41  
42  
43  
44  
45

46 Our analysis suggests that differences in inspection practices across  
47 community pharmacies and hospitals may have contributed to differences in how  
48 opioid losses are reported. For example, Health Canada began a community  
49 pharmacy inspection program (CPIP) in 2015.<sup>25</sup> Our analysis shows a clear upward  
50 trend in the number of line items and dosage units of opioid lost after this program  
51  
52  
53  
54  
55  
56  
57  
58  
59  
60



1  
2  
3 began, but there has been no substantial increase in milligrams lost. It appears the  
4  
5 CPIP may have triggered a higher frequency of reporting from community  
6  
7 pharmacies, but each report now describes smaller losses on average. In contrast,  
8  
9 starting in 2016, Ontario hospitals reported a dramatic increase in milligrams lost to  
10  
11 pilferage (Appendix section 6). One hypothesis is that this is the result of the Ontario  
12  
13 College of Pharmacists' (OCP's) new mandate to inspect and accredit all hospital  
14  
15 pharmacies for the first time, which began in 2016.<sup>26</sup> Perhaps OCP inspections led  
16  
17 hospital pharmacies to enhance their record-keeping and subsequently led to a  
18  
19 greater detection of lost or stolen opioids. Although the reasons for this change are  
20  
21 unclear, we note that OCP inspects every hospital pharmacy, while CPIP only  
22  
23 conducts inspections on a random subset of community pharmacies. Perhaps if a  
24  
25 greater number of community pharmacies were inspected, there would be a  
26  
27 stronger regulatory pressure to ensure strong controlled drug management  
28  
29 processes and by extension, community pharmacies would detect and report a  
30  
31 higher number of losses in response to the CPIP. Given the potential impact of  
32  
33 inspection programs on the detection and reporting of opioid losses, further  
34  
35 research is required to investigate whether expanded inspection programs for  
36  
37 community pharmacies, companies, and hospitals may be helpful in all Canadian  
38  
39 provinces and territories.  
40  
41  
42  
43  
44  
45  
46

47  
48 Fortunately, our analysis also suggests productive next steps for some areas.  
49  
50 For example, British Columbia demonstrates a remarkable reduction in community  
51  
52 pharmacy losses from armed robberies and break and enter incidents (see  
53  
54 Appendix Table A7), possibly due to the implementation of time-delay safes.<sup>27,28</sup>  
55  
56  
57  
58  
59  
60

1  
2  
3 Sharing of best practices between provinces may therefore help reduce opioid  
4 losses in the future. Similarly, if other provinces were to adopt a hospital  
5 accreditation process like the OCP, it is possible that a similar increase in the  
6  
7  
8  
9  
10  
11  
12  
13  
14  
15  
16  
17  
18  
19  
20  
21  
22  
23  
24  
25  
26  
27  
28  
29  
30  
31  
32  
33  
34  
35  
36  
37  
38  
39  
40  
41  
42  
43  
44  
45  
46  
47  
48  
49  
50  
51  
52  
53  
54  
55  
56  
57  
58  
59  
60

Sharing of best practices between provinces may therefore help reduce opioid losses in the future. Similarly, if other provinces were to adopt a hospital accreditation process like the OCP, it is possible that a similar increase in the detection or reporting of opioid losses from other provinces' hospitals could occur.

Our data also suggests areas where more attention is needed. For example, community pharmacies, companies and hospitals all cite 'unexplained losses' as a major category of loss. Across these facility types, approximately 24.4 kilograms of opioids were lost without an explanation. Canadian facilities either lack sufficient guidance on how to track and account for controlled drugs, or are unable to implement known best practices; further work is urgently needed to amend this issue. While a recent scoping review outlines the literature on this topic for hospital settings,<sup>5</sup> we are not aware of literature for community pharmacies or companies. Notably companies lost 17.1% of the OMEQs in our dataset, and 'losses in transit' are responsible for 30% of company losses. Further oversight of commercial entities may be an important priority for policy-makers and regulators moving forward.

We suspect that the true quantities of loss are even higher than what our analysis suggests. This is because previous literature highlights challenges with respect to detecting or reporting losses for both controlled and non-controlled drugs (e.g., propofol). For example, hospitals have previously been fined for insufficient record-keeping and failing to report drug losses.<sup>29-31</sup> One endoscopy clinic found over \$10,000 of propofol was unaccounted for in only a 4 week period.<sup>32</sup> These examples suggest that poor traceability obscures detection and reporting of drug losses. In addition, there are other controlled substances that are

1  
2  
3 reported to HC that we did not analyze, but may be prone to misuse and diversion  
4  
5 (e.g., benzodiazepines). Inclusion of non-opioids in future studies would increase  
6  
7 the total doses lost, and the subsequent costs of lost drug.  
8  
9

10 Moving forward, we suggest that Health Canada (HC), like the DEA,<sup>12</sup> publish  
11  
12 a freely accessible report describing controlled substance losses, preferably on an  
13  
14 annual basis. This report would facilitate a more accurate and regular assessment of  
15  
16 controlled substance losses. However, we recommend the report describes dose  
17  
18 (i.e., milligrams, OMEQs) losses by province and territory for use by policy makers  
19  
20 and the public. As described previously, our findings show that milligram losses  
21  
22 provide a more accurate representation of opioid loss trends than either dosage  
23  
24 units or incidents of loss. Therefore, the HC loss and reporting form should capture  
25  
26 the number of milligrams lost per drug, and the dosage format of the loss. The  
27  
28 current HC form is ambiguous as the reported quantity could refer to the dosage  
29  
30 form (e.g., patch, ampoule), or the unit (e.g., micrograms, millilitres). We believe  
31  
32 such an annual report of dose losses will promote discussion and sharing of best  
33  
34 practices, possibly accelerating uptake of safeguards across the country.  
35  
36  
37  
38  
39  
40

### 41 Limitations

42  
43  
44 Our analysis has several limitations. First, HC data may be subject to  
45  
46 reporting bias. Jurisdictions with high reported losses may not be undergoing a  
47  
48 higher true loss rate, but may only be more diligent at reporting the losses they do  
49  
50 experience. Second, not all drugs reported lost are due to diversion, and diverted  
51  
52 drugs may be used personally rather than resold on the street market. Our analysis  
53  
54 is not intended to estimate actual revenue from street sales of lost drug, but to  
55  
56  
57  
58  
59  
60

1  
2  
3 contextualize the potential losses and highlight the differences between wholesale  
4 costs and street value. Third, our estimates of wholesale costs and street value are  
5 simplified, as we applied single point-in-time estimates from select provincial  
6 formularies or police services to the whole dataset.  
7  
8  
9  
10  
11

## 12 Conclusion

13  
14  
15  
16 The drug losses we have conservatively estimated are large and suggest the  
17 need for further research given the other indirect costs of drug diversion. For  
18 example, drugs diverted from the healthcare system can be resold, channelling  
19 taxpayer dollars directly into the hands of drug traffickers, while increasing the  
20 supply and harms of illicit opioids to surrounding communities and burdening  
21 patients and prescribers who require opioids for legitimate medical use. Ensuring  
22 that reports of controlled drug loss unambiguously capture the dose (e.g.,  
23 milligrams) of the loss, as well as transparent and standardized methods of making  
24 this data available, will further the understanding and causes of opioid losses from  
25 Canadian facilities.  
26  
27  
28  
29  
30  
31  
32  
33  
34  
35  
36  
37  
38  
39

## 40 Acknowledgements

41  
42 We thank Chris Auger (Ontario Provincial Police) for providing estimates of street  
43 value per milligram. We also thank Danny Liu, Lauren Datema, Emily Brown, Kiera  
44 Robinson (Doctor of Pharmacy Students), for collecting wholesale drug pricing  
45 information and parsing the Health Canada dataset. We thank Iveta Lewis  
46 (Information Scientist) for searching the literature on drug street prices. Our thanks  
47 to Tara Carman and CBC News for publishing the Health Canada dataset that was  
48  
49  
50  
51  
52  
53  
54  
55  
56  
57  
58  
59  
60

1  
2  
3 the basis for this article.  
4  
5

## 6 7 **References**

- 8  
9 1. Berge KH, Dillon KR, Sikkink KM, Taylor TK, Lanier WL. Diversion of Drugs  
10  
11 Within Health Care Facilities, a Multiple-Victim Crime: Patterns of Diversion,  
12  
13 Scope, Consequences, Detection, and Prevention. *Mayo Clin Proc* [Internet].  
14  
15 2012;87(7):674–82. Available from:  
16  
17 <http://dx.doi.org/10.1016/j.mayocp.2012.03.013>  
18  
19
- 20  
21 2. Brummond PW, Chen DF, Churchill WW, Clark JS, Dillon KR, Dumitru D, et al.  
22  
23 ASHP Guidelines on Preventing Diversion of Controlled Substances. *Am J Heal*  
24  
25 *Pharm* [Internet]. 2017 Mar 1;74(5):325–48. Available from:  
26  
27 <https://academic.oup.com/ajhp/article/74/5/325/5103352>  
28  
29
- 30  
31 3. Canadian Society of Hospital Pharmacists. Controlled Drugs and Substances in  
32  
33 Hospitals and Healthcare Facilities: Guidelines on Secure Management and  
34  
35 Diversion Prevention [Internet]. 2019. Available from:  
36  
37 <https://www.cshp.ca/sites/default/files/files/publications/Official>  
38  
39 [Publications/Guidelines/Controlled Drugs and Substances in Hospitals and](https://www.cshp.ca/sites/default/files/files/publications/Official)  
40  
41 [Healthcare Facilities\\_2019\\_02-28.pdf](https://www.cshp.ca/sites/default/files/files/publications/Official)  
42  
43
- 44  
45 4. Schaefer MK, Perz JF. Outbreaks of Infections Associated With Drug Diversion  
46  
47 by US Health Care Personnel. *Mayo Clin Proc* [Internet]. 2014;89(7):878–87.  
48  
49 Available from: <http://dx.doi.org/10.1016/j.mayocp.2014.04.007>  
50
- 51  
52 5. Fan M, Tscheng D, Hamilton M, Hyland B, Reding R, Trbovich P. Diversion of  
53  
54 Controlled Drugs in Hospitals: A Scoping Review of Contributors and  
55  
56 Safeguards. *J Hosp Med* [Internet]. 2019;15(7):419–28. Available from:  
57  
58

- 1  
2  
3 <https://www.journalofhospitalmedicine.com/jhospmed/article/202732/hospital-medicine/diversion-controlled-drugs-hospitals-scoping-review>  
4  
5  
6  
7
- 8 6. Carman T, Adhopia V. More than 9 million prescription drugs have gone  
9  
10 missing from pharmacies since 2012 [Internet]. CBC News. 2018. Available  
11 from: <https://www.cbc.ca/news/canada/missing-drugs-pharmacies-part1-1.4708041>  
12  
13  
14  
15  
16
- 17 7. LaVigne N, Wartell J. Robbery of Pharmacies [Internet]. Washington, D.C.; 2015.  
18 Available from:  
19  
20 [https://www.popcenter.org/sites/default/files/problems/PDFs/robbery\\_of\\_](https://www.popcenter.org/sites/default/files/problems/PDFs/robbery_of_pharmacies.pdf)  
21 [pharmacies.pdf](https://www.popcenter.org/sites/default/files/problems/PDFs/robbery_of_pharmacies.pdf)  
22  
23  
24  
25
- 26 8. Stanton C. 18.7M pills lost due to healthcare employee misuse and theft  
27 [Internet]. Protentus. 2018. Available from:  
28  
29 [https://blog.protenus.com/18.7m-pills-lost-due-to-healthcare-employee-](https://blog.protenus.com/18.7m-pills-lost-due-to-healthcare-employee-misuse-and-theft)  
30 [misuse-and-theft](https://blog.protenus.com/18.7m-pills-lost-due-to-healthcare-employee-misuse-and-theft)  
31  
32  
33  
34  
35
- 36 9. Berge KH, Lanier WL. Bloodstream infection outbreaks related to opioid-  
37 diverting health care workers: A cost-benefit analysis of prevention and  
38 detection programs. *Mayo Clin Proc* [Internet]. 2014;89(7):866–8. Available  
39 from: [https://www.scopus.com/inward/record.uri?eid=2-s2.0-](https://www.scopus.com/inward/record.uri?eid=2-s2.0-84904717730&doi=10.1016%2Fj.mayocp.2014.04.010&partnerID=40&md5=3d47cd0f14c1097da465917935f6831d)  
40 [84904717730&doi=10.1016%2Fj.mayocp.2014.04.010&partnerID=40&md5](https://www.scopus.com/inward/record.uri?eid=2-s2.0-84904717730&doi=10.1016%2Fj.mayocp.2014.04.010&partnerID=40&md5=3d47cd0f14c1097da465917935f6831d)  
41 [=3d47cd0f14c1097da465917935f6831d](https://www.scopus.com/inward/record.uri?eid=2-s2.0-84904717730&doi=10.1016%2Fj.mayocp.2014.04.010&partnerID=40&md5=3d47cd0f14c1097da465917935f6831d)  
42  
43  
44  
45  
46  
47  
48  
49
- 50 10. New K. Investigating Institutional Drug Diversion. *J Leg Nurse Consult*  
51 [Internet]. 2015;26(4):15–8. Available from:  
52 <http://search.ebscohost.com/login.aspx?direct=true&db=cin20&AN=113626>  
53  
54  
55  
56  
57  
58

- 679&site=ehost-live
11. Joranson DE, Gilson AM. Drug crime is a source of abused pain medications in the United States. *J Pain Symptom Manag* [Internet]. 2005;30(4):299–301. Available from: <http://dx.doi.org/10.1016/j.jpainsymman.2005.09.001>
  12. Drug Enforcement Administration. 2018 National Drug Threat Assessment [Internet]. 2018. Available from: [https://www.dea.gov/sites/default/files/2018-11/DIR-032-18 2018 NDTA final low resolution.pdf](https://www.dea.gov/sites/default/files/2018-11/DIR-032-18%202018%20NTA%20final%20low%20resolution.pdf)
  13. Health Canada. Reporting of loss or theft of controlled substances, precursors and cannabis - Canada.ca [Internet]. 2018. Available from: <https://www.canada.ca/en/health-canada/services/publications/healthy-living/loss-theft-controlled-substances-precursors.html>
  14. Carman T, Adhopia V. More than half a million prescription drugs are stolen each year - and most are opioids [Internet]. *CBC News*; 2018. Available from: <https://www.cbc.ca/news/canada/missing-drugs-pharmacies-part1-1.4708041>
  15. Tromp S. Prescription drug losses, thefts on the rise at smaller B.C. hospitals. *The Globe and Mail* [Internet]. 2016; Available from: <https://www.theglobeandmail.com/news/british-columbia/prescription-drug-losses-thefts-on-the-rise-at-smaller-bc-hospitals/article28826576/>
  16. Howorun C. “Unexplained losses” of opioids on the rise in Canadian hospitals [Internet]. 2017. Available from: <http://www.macleans.ca/society/health/unexplained-losses-of-opioids-on->

- 1  
2  
3 the-rise-in-canadian-hospitals/  
4  
5  
6 17. Pagliaro J. How the freedom of information system often results in secrecy  
7  
8 instead of transparency. The Toronto Star [Internet]. 2019 May 7; Available  
9  
10 from: [https://www.thestar.com/news/city\\_hall/2019/04/18/how-the-](https://www.thestar.com/news/city_hall/2019/04/18/how-the-freedom-of-information-system-often-results-in-secrecy-instead-of-transparency.html)  
11  
12 [freedom-of-information-system-often-results-in-secrecy-instead-of-](https://www.thestar.com/news/city_hall/2019/04/18/how-the-freedom-of-information-system-often-results-in-secrecy-instead-of-transparency.html)  
13  
14 [transparency.html](https://www.thestar.com/news/city_hall/2019/04/18/how-the-freedom-of-information-system-often-results-in-secrecy-instead-of-transparency.html)  
15  
16  
17 18. Carman T. Analysis of Health Canada missing controlled substances and  
18  
19 precursors data, Jan. 1, 2012 - Sept. 30, 2017 [dataset] [Internet]. 2018.  
20  
21 Available from: [https://github.com/taracarman/drug\\_losses](https://github.com/taracarman/drug_losses)  
22  
23  
24 19. Carman T. When prescription opioids run out, users look for the supply on the  
25  
26 streets [Internet]. 2018. Available from:  
27  
28 [https://www.cbc.ca/news/canada/when-prescription-opioids-run-out-](https://www.cbc.ca/news/canada/when-prescription-opioids-run-out-users-look-for-the-supply-on-the-streets-1.4720952)  
29  
30 [users-look-for-the-supply-on-the-streets-1.4720952](https://www.cbc.ca/news/canada/when-prescription-opioids-run-out-users-look-for-the-supply-on-the-streets-1.4720952)  
31  
32  
33 20. Canadian Institute for Health Information. Pan-Canadian Trends in the  
34  
35 Prescribing of Opioids and Benzodiazepines, 2012 to 2017 — Data Tables  
36  
37 [Internet]. 2018. Available from:  
38  
39 [https://www.cihi.ca/sites/default/files/document/pan-canadian-prescribed-](https://www.cihi.ca/sites/default/files/document/pan-canadian-prescribed-opioid-benzo-data-tables-june18-en-web.xlsx)  
40  
41 [opioid-benzo-data-tables-june18-en-web.xlsx](https://www.cihi.ca/sites/default/files/document/pan-canadian-prescribed-opioid-benzo-data-tables-june18-en-web.xlsx)  
42  
43  
44 21. Government of Canada. Forward Regulatory Plan 2019-2021: Regulations  
45  
46 amending Schedule I to the Controlled Drugs and Substances Act and the  
47  
48 Schedule to the Narcotic Control Regulations to add tramadol and related  
49  
50 substances [Internet]. 2019 [cited 2019 May 14]. Available from:  
51  
52 <https://www.canada.ca/en/health-canada/corporate/about-health->  
53  
54  
55  
56  
57  
58  
59  
60



- canada/legislation-guidelines/acts-regulations/forward-regulatory-plan/plan/tramadol.html
22. Health Canada. Drug Product Database online query [Internet]. 2019 [cited 2018 Oct 5]. Available from: <https://health-products.canada.ca/dpd-bdpp/index-eng.jsp>
  23. Lebin JA, Murphy DL, Severtson SG, Bau GE, Dasgupta N, Dart RC. Scoring the best deal: Quantity discounts and street price variation of diverted oxycodone and oxymorphone. *Pharmacoepidemiol Drug Saf* [Internet]. 2019;28(1):25–30. Available from: <http://dx.doi.org/10.1002/pds.4558>
  24. Dasgupta N, Freifeld C, Brownstein JS, Menone CM, Surratt HL, Poppish L, et al. Crowdsourcing black market prices for prescription opioids. *J Med Internet Res* [Internet]. 2013;15(8):e178. Available from: <http://dx.doi.org/10.2196/jmir.2810>
  25. Health Canada. Community Pharmacy Inspection Program Annual Report, Fiscal Year 2015-2016 [Internet]. 2017 [cited 2019 Apr 18]. Available from: <https://www.canada.ca/en/health-canada/services/drugs-health-products/reports-publications/compliance-enforcement/community-pharmacy-inspection-program-annual-report-fiscal-year-2015-2016.html>
  26. Foxman S. Baseline Assessments Reveal Opportunities for Hospital Pharmacies. *Pharm Connect* [Internet]. 2016;23(1):8–33. Available from: <http://www.ocpinfo.com/library/practice-related/download/BaselineAssessmentsWinter2016.pdf>
  27. Lindsay B. Time-delay safes linked to steep drop in robberies from B.C.

- 1  
2  
3 pharmacies [Internet]. CBC News. 2018. Available from:  
4  
5 [https://www.cbc.ca/news/canada/british-columbia/time-delay-safes-linked-](https://www.cbc.ca/news/canada/british-columbia/time-delay-safes-linked-to-steep-drop-in-robberies-from-b-c-pharmacies-1.4725455)  
6  
7 [to-steep-drop-in-robberies-from-b-c-pharmacies-1.4725455](https://www.cbc.ca/news/canada/british-columbia/time-delay-safes-linked-to-steep-drop-in-robberies-from-b-c-pharmacies-1.4725455)  
8  
9
- 10 28. College of Pharmacists of British Columbia. Pharmacy Security Requirements:  
11 What's in Effect Today? [Internet]. 2017 [cited 2019 Apr 18]. Available from:  
12 [https://www.bcpharmacists.org/readlinks/pharmacy-security-](https://www.bcpharmacists.org/readlinks/pharmacy-security-requirements-what's-effect-today)  
13 [requirements-what's-effect-today](https://www.bcpharmacists.org/readlinks/pharmacy-security-requirements-what's-effect-today)  
14  
15  
16  
17  
18
- 19 29. Department of Justice-U S Attorney's Office - District of Massachusetts. MGH  
20 to Pay \$2.3 Million to Resolve Drug Diversion Allegations [Internet]. 2015.  
21 Available from: [https://www.justice.gov/usao-ma/pr/mgh-pay-23-million-](https://www.justice.gov/usao-ma/pr/mgh-pay-23-million-resolve-drug-diversion-allegations)  
22 [resolve-drug-diversion-allegations](https://www.justice.gov/usao-ma/pr/mgh-pay-23-million-resolve-drug-diversion-allegations)  
23  
24  
25  
26  
27  
28
- 29 30. United States Department of Justice. Southern District Of Georgia Announces  
30 Largest Hospital Drug Diversion Civil Penalty Settlement in U.S. History  
31 [Internet]. 2018. Available from: [https://www.justice.gov/usao-](https://www.justice.gov/usao-sdga/pr/southern-district-georgia-announces-largest-hospital-drug-diversion-civil-penalty)  
32 [sdga/pr/southern-district-georgia-announces-largest-hospital-drug-](https://www.justice.gov/usao-sdga/pr/southern-district-georgia-announces-largest-hospital-drug-diversion-civil-penalty)  
33 [diversion-civil-penalty](https://www.justice.gov/usao-sdga/pr/southern-district-georgia-announces-largest-hospital-drug-diversion-civil-penalty)  
34  
35  
36  
37  
38  
39
- 40 31. Drug Enforcement Administration. Record settlement reached in University of  
41 Michigan hospital drug diversion civil penalty case [Internet]. 2018. Available  
42 from: [https://www.dea.gov/press-releases/2018/08/30/record-settlement-](https://www.dea.gov/press-releases/2018/08/30/record-settlement-reached-university-michigan-hospital-drug-diversion)  
43 [reached-university-michigan-hospital-drug-diversion](https://www.dea.gov/press-releases/2018/08/30/record-settlement-reached-university-michigan-hospital-drug-diversion)  
44  
45  
46  
47  
48  
49
- 50 32. Horvath C. Implementation of a new method to track propofol in an  
51 endoscopy unit. *Int J Evid Based Healthc*. 2017;15(3):102–10.  
52  
53  
54  
55  
56  
57  
58  
59  
60

1  
2  
3  
4  
5  
6  
7  
8  
9  
10  
11  
12  
13  
14  
15  
16  
17  
18  
19  
20  
21  
22  
23  
24  
25  
26  
27  
28  
29  
30  
31  
32  
33  
34  
35  
36  
37  
38  
39  
40  
41  
42  
43  
44  
45  
46  
47  
48  
49  
50  
51  
52  
53  
54  
55  
56  
57  
58  
59  
60

Confidential

**Table 1**

| <b>Analysis of opioid losses reported to Health Canada (Jan 2012 to Sept 2017)</b> |               |                                  |                                                  |                                 |                                  |                               |
|------------------------------------------------------------------------------------|---------------|----------------------------------|--------------------------------------------------|---------------------------------|----------------------------------|-------------------------------|
|                                                                                    | <b>Route</b>  | <b>Milligrams lost (rounded)</b> | <b>Oral Morphine Milligram Equivalent (OMEQ)</b> | <b>Daily Defined Dose (DDD)</b> | <b>Estimated Wholesale Value</b> | <b>Estimated Street Value</b> |
| Codeine                                                                            | Oral          | 47,072,328                       | 7,060,849                                        | 196,135                         | \$1,313,140                      | \$52,956,369                  |
|                                                                                    | Injectable    | 3,720                            | 930                                              | 58                              | \$514                            | \$4,185                       |
|                                                                                    | Indeterminate | 228,717                          | 34,308                                           | 953                             | \$6,369                          | \$257,306                     |
| Fentanyl                                                                           | Oral          | 66,828                           | 8,687,588                                        | 111,379                         | \$3,212,163                      | \$26,731                      |
|                                                                                    | Injectable    | 10,642                           | 1,064,527                                        | 66,513                          | \$302,036                        | \$4,257                       |
|                                                                                    | Patch         | 184,032                          | 18,403,190                                       | 153,360                         | \$199,936                        | \$5,111,997                   |
|                                                                                    | Indeterminate | 2,691                            | 349,819                                          | 4,486                           | \$129,346                        | \$1,077                       |
| Hydro-morphone                                                                     | Oral          | 12,157,649                       | 60,788,244                                       | 607,882                         | \$1,446,912                      | \$18,236,474                  |
|                                                                                    | Injectable    | 544,387                          | 9,526,775                                        | 136,097                         | \$199,890                        | \$816,581                     |
|                                                                                    | Rectal        | 468                              | 2808                                             | 117                             | \$593                            | \$702                         |
|                                                                                    | Indeterminate | 19,202                           | 96,008                                           | 960                             | \$2,288                          | \$28,803                      |
| Morphine                                                                           | Oral          | 15,154,599                       | 15,154,599                                       | 151,546                         | \$353,846                        | \$12,578,317                  |
|                                                                                    | Injectable    | 325,571                          | 976,713                                          | 10,852                          | \$205,417                        | \$270,224                     |
|                                                                                    | Rectal        | 73,045                           | 87,654                                           | 2,435                           | \$11,318                         | \$60,627                      |
|                                                                                    | Indeterminate | 134,692                          | 134,692                                          | 1,347                           | \$3,151                          | \$111,794                     |
| Oxycodone                                                                          | Oral          | 36,537,298                       | 54,805,947                                       | 487,164                         | \$1,312,734                      | \$45,671,623                  |
|                                                                                    | Rectal        | 9,580                            | 17,244                                           | 319                             | \$3,229                          | \$11,975                      |
| <b>Total</b>                                                                       |               | <b>112,525,448</b>               | <b>177,191,636</b>                               | <b>1,931,603</b>                | <b>\$8,702,882</b>               | <b>\$136,149,042</b>          |

**Source:** Authors' analysis of data for Jan. 2012 to Sept. 2017 from reports of controlled substances loss or theft to Health Canada as published by CBC News in June 2018.

**Notes:** Oral refers to tablets, capsules, sublingual and oral solutions (e.g., syrups). Injectable includes intravenous and subcutaneous formats. Fentanyl is typically dosed in micrograms, but for consistency with other drugs we report in milligrams. Indeterminate refers to line items in the dataset where the route or format of the drug was ambiguous. See Appendix for details on how OMEQ, DDD, wholesale and street value were calculated.

**Table 2**

| <b>Oral Morphine Equivalents (Milligrams) Lost by Facility Type (Jan 2012 to Sept 2017)</b> |                |                 |                      |                 |                  |                                  |
|---------------------------------------------------------------------------------------------|----------------|-----------------|----------------------|-----------------|------------------|----------------------------------|
|                                                                                             | <b>Codeine</b> | <b>Fentanyl</b> | <b>Hydromorphone</b> | <b>Morphine</b> | <b>Oxycodone</b> | <b>Total (% of column total)</b> |
| Community Pharmacy                                                                          | 6,222,350      | 16,983,007      | 46,535,105           | 14,255,156      | 52,112,872       | 136,108,490 (76.8)               |
| Companies                                                                                   | 815,047        | 10,041,648      | 15,730,665           | 1,432,737       | 2,298,522        | 30,318,620 (17.1)                |
| Hospital                                                                                    | 42,530         | 1,468,245       | 8,143,350            | 647,885         | 395,222          | 10,697,232 (6.0)                 |
| Long term care facility                                                                     | 11,733         | 1,999           | 3,170                | 930             | 15,473           | 33,304 (0)                       |
| Nurse station*                                                                              | 3,653          | 2,000           | 420                  | 8,580           | 578              | 15,230 (0)                       |
| Canadian Forces Base                                                                        | 774            | 7,250           | 1,100                | 1,200           | 525              | 10,849 (0)                       |
| Ambulatory Services%                                                                        | -              | 1,975           | 25                   | 7,170           | -                | 9,170 (0)                        |
| <b>Total</b>                                                                                | <b>7096.1</b>  | <b>28,506.1</b> | <b>70,413.8</b>      | <b>16,353.7</b> | <b>54,823.2</b>  | <b>177,192.9</b>                 |

**Source:** Authors' analysis of data for Jan. 2012 to Sept. 2017 from reports of controlled substances loss or theft to Health Canada as published by CBC News in June 2018.

\* Nurse stations are found in small rural and isolated communities where access to health care is otherwise limited; they are staffed by registered nurses or nurse practitioners typically providing primary care, and have limited on-site availability of a physician partner.

% Ambulatory Services are typically clinics affiliated with an institution/hospital and provide procedures or services on an outpatient basis or are stand-alone clinics providing similar services.

**Table 3****Milligrams Lost by Loss Description and Facility Type (Jan 2012 to Sept 2017)**

|                                                | <b>Community<br/>Pharmacy</b> | <b>% of<br/>column<br/>total</b> | <b>Companies</b> | <b>% of<br/>column<br/>total</b> | <b>Hospitals</b> | <b>% of<br/>column<br/>total</b> |
|------------------------------------------------|-------------------------------|----------------------------------|------------------|----------------------------------|------------------|----------------------------------|
| Armed Robbery                                  | 30,935,204                    | 31.1                             | 10,948           | 0.1                              | 16               | 0.0                              |
| Break and Entry                                | 27,978,876                    | 28.1                             | 147,467          | 1.3                              | 64,105           | 4.5                              |
| Breakage – In Transit                          | 275,596                       | 0.3                              | 58,570           | 0.5                              | 345              | 0.0                              |
| Breakage – On Site                             | 5,898                         | 0.0                              | -                | 0.0                              | 595              | 0.0                              |
| Grab Theft                                     | 1,381,305                     | 1.4                              | 790,586          | 6.9                              | 34,337           | 2.4                              |
| Impersonation                                  | 74,438                        | 0.1                              | -                | 0.0                              | -                | 0.0                              |
| Loss in Transit                                | 159,177                       | 0.2                              | 3,538,645        | 30.7                             | 15,186           | 1.1                              |
| Loss Unexplained                               | 17,481,035                    | 17.6                             | 6,429,180        | 55.8                             | 475,411          | 33.4                             |
| Manufacturer's Defects<br>(Ampoules)           | 20                            | 0.0                              | 100              | 0.0                              | 15               | 0.0                              |
| Manufacturer's<br>Shortage (Sealed<br>Bottles) | 28,642                        | 0.0                              | 34,543           | 0.3                              | 1,066            | 0.1                              |
| Other                                          | 5,659,021                     | 5.7                              | 248,294          | 2.2                              | 14,289           | 1.0                              |
| Over shipment (picking<br>error)               | 433                           | 0.0                              | 2,800            | 0.0                              | -                | 0.0                              |
| Pilferage                                      | 15,459,032                    | 15.5                             | 260,175          | 2.3                              | 817,574          | 57.4                             |
| Spillage                                       | 6,062                         | 0.0                              | -                | 0.0                              | 242              | 0.0                              |
| Under shipment                                 | 4,050                         | 0.0                              | 389              | 0.0                              | -                | 0.0                              |

**Source:** Authors' analysis of data for Jan. 2012 to Sept. 2017 from reports of controlled substances loss or theft to Health Canada as published by CBC News in June 2018.

Table 4

**Comparison of Incidents of Loss, Dosage Units Lost, and Milligrams Lost by Facility Type (Jan 2012 to Sept 2017)**

|                             | 2012       | 2013       | 2014       | 2015       | 2016       | 2017 (up to Sept. only) | R <sup>2</sup> Value |
|-----------------------------|------------|------------|------------|------------|------------|-------------------------|----------------------|
| <b>Community Pharmacies</b> |            |            |            |            |            |                         |                      |
| Incidents of Loss           | 4587       | 3948       | 5879       | 7768       | 13743      | 22517                   | 0.809                |
| Dosage units lost           | 736,886    | 596,185    | 947,010    | 978,053    | 1,152,808  | 1,425,626               | 0.870                |
| Milligrams lost             | 17,090,993 | 10,904,398 | 16,870,555 | 18,286,108 | 17,425,604 | 18,871,131              | 0.308                |
| <b>Companies</b>            |            |            |            |            |            |                         |                      |
| Incidents of Loss           | 338        | 412        | 524        | 568        | 407        | 252                     | 0.034                |
| Dosage units lost           | 90,562     | 136,032    | 173,273    | 111,022    | 53,296     | 24,053                  | 0.399                |
| Milligrams lost             | 1,355,671  | 1,974,753  | 2,144,427  | 1,585,595  | 3,680,476  | 780,775                 | 0.008                |
| <b>Hospitals</b>            |            |            |            |            |            |                         |                      |
| Incidents of Loss           | 650        | 673        | 649        | 625        | 707        | 576                     | 0.124                |
| Dosage units lost           | 29,692     | 17,820     | 47,679     | 18,379     | 45,929     | 16441                   | 0.002                |
| Milligrams lost             | 128,593    | 155,630    | 88,264     | 213,066    | 318,768    | 518,859                 | 0.738                |

**Source:** Authors' analysis of data for Jan. 2012 to Sept. 2017 from reports of controlled substances loss or theft to Health Canada as published by CBC News in June 2018.

Appendix for “Opioid losses in terms of dosage and cost: a retrospective analysis of Health Canada data”  
Authors: Fan, Tscheng, Hamilton, Trbovich

## Appendix

The appendix is composed of eight sections.

1. **Database scan:** This section describes the methods and results of a pilot study the authors conducted to determine what databases containing controlled drug loss reports were available in Canada. Health Canada’s controlled drug loss database proved to have the largest volume of data for analysis.
2. **Milligram calculation procedure:** This section outlines the steps the authors undertook to extract the milligram losses from the Health Canada dataset, including assumptions we made for rows that were ambiguous in nature.
3. **Conversion factors:** This section outlines the conversion factors used to convert the milligrams lost into Oral Morphine Equivalents (OMEQs) and Daily Defined Doses (DDDs). It includes the references and reasoning we used to select the conversion factors. **\*\*These conversion factors should not be used for clinical purposes\*\***
4. **Street pricing estimates:** This section describes our strategy for estimating street pricing.
5. **Opioid milligram losses for community pharmacies:** This section provides an extended table showing the milligram losses for community pharmacies from each province and territory. The only loss types shown are armed robbery, break and entry, unexplained losses and pilferage, as these are the major categories of loss for pharmacies (see Table 3 in the main article).
6. **Opioid milligram losses for hospitals:** This section provides an extended table showing the milligram losses for hospitals from each province and territory. The only loss types shown are unexplained losses and pilferage, as these are the major categories of loss for hospitals (see Table 3 in the main article).
7. **Line graphs depicting loss trends for community pharmacies, companies, and hospitals:** Loss trends differ when measured in milligrams, dosage units, and incidents of loss (e.g., line items in Health Canada data).
8. **Reference list for Appendix**



Appendix for “Opioid losses in terms of dosage and cost: a retrospective analysis of Health Canada data”  
Authors: Fan, Tscheng, Hamilton, Trbovich

## 1. Database Scan

### Scope

As part of a pilot project to understand how hospitals were affected by diversion, data were requested from select national databases and from known Ontario databases. The detailed scan was undertaken in Ontario to assess the feasibility of a comprehensive review of all Canadian databases. Ontario is the most populous province in Canada, and its databases were deemed the most likely to return data if hospital diversion is a rarely reported phenomenon.

### Database identification

The database scan was approved by the North York General Hospital Research Ethics Board (#17-0024). Members of the research team associated with the Institute for Safe Medication Practices Canada (ISMP Canada), through relationships with other health care data-holding organizations, identified a series of databases that might hold incident records or information related to diversion of controlled drugs. Clinical members of the research team identified regulatory college databases related to clinical practice in the various health disciplines expected to have contact with controlled drugs. During discussion with database custodians, researchers asked about any additional or alternative databases that might hold relevant data. For instance, one custodian of a regulatory database suggested review of an insurance database.

### Database search methodology

Requests for data were made to organizations hosting potentially relevant diversion incidents between July 6, 2017, and November 2, 2017. Database requests were administered via 4 mechanisms (Table A1).

Appendix for “Opioid losses in terms of dosage and cost: a retrospective analysis of Health Canada data”  
 Authors: Fan, Tscheng, Hamilton, Trbovich

**Table A1**

**Mechanisms of database requests**

| Mechanism                                                | Description                                                                                                                                                        |
|----------------------------------------------------------|--------------------------------------------------------------------------------------------------------------------------------------------------------------------|
| Freedom of information or access to information requests | Written requests for data held by provincial and federal public sector agencies (e.g., law enforcement agencies)                                                   |
| Direct queries                                           | Searches performed by the research team, whereby XXX had direct interface with the database holdings                                                               |
| Manual review of public data                             | Individual manual review of publicly available disciplinary records (e.g., disciplinary reports from a regulatory body’s website) by members of the research team  |
| Direct inquiries                                         | Requests to database administrators for specific information from the databases of interest, whereby the research team did not have direct access to the databases |

Source: Authors’ description of methodological approach to database scan.

These search strategies were individualized to reflect variations in data storage constraints, taxonomy and classification systems among the databases. In cases of direct inquiries, database custodians were given the theme of the research and the general request (e.g., “Reports [e.g., investigative, disciplinary, incident, analysis, incident, loss or other] of controlled-drug diversion or theft by health care workers”). For non–health care organizations (e.g., law enforcement agencies), additional qualifiers (e.g., “opioids”) were added to the request, to help ensure that all relevant reports were considered for retrieval. The databases used different classification systems and keywords; in most cases, discussion with the database custodian resulted in more refined search strategies that allowed capture of appropriate incidents or case examples. For example “diversion” did not exist as a concept in the law enforcement databases; therefore, only “theft” was used as a search term.

In some cases, data holders did not maintain the data in a format that was easily accessible for review, filtering and/or searching. For example, certain data holders, such as regulatory colleges, held and published case incidents and findings for the purposes of disciplinary hearings or for public disclosure, but not necessarily for research or subsequent analysis. As such, search capability was not always available, and a manual review of public data (e.g. published disciplinary cases) was performed in some instances.

**Database eligibility criteria**

Database holdings that were not related to hospital settings (e.g., community pharmacy reports) were excluded, as they were outside the study scope.

The search timeframes ranged from a minimum of 1 year to no time restrictions; the particular timeframe for each database was determined in consultation with database custodians, to adequately capture the types of information held in the database without retrieving an excessive number of reports. For databases that were expected to hold a smaller number of incidents, the timeframe was typically from database initiation to the present. For databases with no or limited search functionality, manual review was required, and time limits were applied, based on the volume of reports encountered and the availability of past reports.

**Results**

Data held by 35 Canadian organizations were considered for the database scan. Databases were excluded if they contained only clinical or patient outcome data, drug cost data or non-drug theft data; if the custodian did not

Appendix for “Opioid losses in terms of dosage and cost: a retrospective analysis of Health Canada data”  
Authors: Fan, Tscheng, Hamilton, Trbovich

respond; or if the host organizations had acted as bargaining, advocacy or union organizations. Responses were available from 15 organizations about the incidence of controlled drug diversion in their records, but not all shared data. These databases are described in Table A2, along with the data obtained.

Confidential

1  
2  
3  
4  
5  
6  
7  
8  
9  
10  
11  
12  
13  
14  
15  
16  
17  
18  
19  
20  
21  
22  
23  
24  
25  
26  
27  
28  
29  
30  
31  
32  
33  
34  
35  
36  
37  
38  
39  
40  
41  
42  
43  
44  
45  
46  
47  
48  
49  
50  
51  
52  
53  
54  
55  
56  
57  
58  
59  
60

Appendix for “Opioid losses in terms of dosage and cost: a retrospective analysis of Health Canada data”

Authors: Fan, Tscheng, Hamilton, Trbovich

**Table A2**

**Quantitative findings of database scan**

| Manner of request                                       | Organization Name and Database Name (if applicable) | Organization Type | Expected holdings                                                         | Search terms or request                                                                                                                         | Time limits                   | Quantitative data                                                                                                                                                                                                                                                                                                                                                                                                                                                                                                                                             | Comments                                                                                                                                                                                                   |
|---------------------------------------------------------|-----------------------------------------------------|-------------------|---------------------------------------------------------------------------|-------------------------------------------------------------------------------------------------------------------------------------------------|-------------------------------|---------------------------------------------------------------------------------------------------------------------------------------------------------------------------------------------------------------------------------------------------------------------------------------------------------------------------------------------------------------------------------------------------------------------------------------------------------------------------------------------------------------------------------------------------------------|------------------------------------------------------------------------------------------------------------------------------------------------------------------------------------------------------------|
| Freedom of information or access to information request | Health Canada                                       | Regulator         | Loss report forms submitted to Health Canada's Office of Controlled drugs | Reports of diversion or loss or misuse of controlled drugs (including narcotics) in Canada                                                      | January 2016 to December 2016 | Total number of records reported from hospitals: 991<br><br>840 out of the 991 reports were categorized as “Loss Unexplained”<br><br>By province:<br><ul style="list-style-type: none"> <li>• Ontario: 556 reports</li> <li>• Alberta: 190 reports</li> <li>• Quebec: 101 reports</li> <li>• British Columbia: 58 reports</li> <li>• Saskatchewan: 39 reports</li> <li>• Manitoba: 29 reports</li> <li>• Newfoundland: 6 reports</li> <li>• Nova Scotia: 5 reports</li> <li>• New Brunswick: 4 reports</li> <li>• Northwest Territories: 3 reports</li> </ul> | Some data available in the loss/theft report forms submitted to Health Canada (including specific drugs and dosages lost, countermeasures taken) were not released by Health Canada, for security reasons. |
|                                                         | York Regional Police                                | Law enforcement   | Investigation reports                                                     | “Drug theft from hospitals in York Region investigated by York Regional Police”                                                                 | January 2012 to December 2016 | 20 reports, of which 18 (describing 15 separate incidents) were eligible                                                                                                                                                                                                                                                                                                                                                                                                                                                                                      | After discussion with the database custodian, original search timeframe was expanded, to increase the volume of reports available for review.                                                              |
|                                                         | Royal Canadian Mounted Police                       | Law enforcement   | Investigation reports                                                     | Investigative reports of theft or loss of controlled drugs (opioids, narcotics, stimulants or other controlled drugs) from hospitals in Ontario | January 2015 to December 2016 | Response received, but no records found                                                                                                                                                                                                                                                                                                                                                                                                                                                                                                                       |                                                                                                                                                                                                            |

## Appendix for "Opioid losses in terms of dosage and cost: a retrospective analysis of Health Canada data"

Authors: Fan, Tscheng, Hamilton, Trbovich

| Manner of request                 | Organization Name and Database Name (if applicable)                                                                                                                                                           | Organization Type               | Expected holdings           | Search terms or request                                                                                                                                                                                 | Time limits                                                                                                                                    | Quantitative data                                                                                                                                                                                                                    | Comments                                                                                                                                                                                                                                                                                                        |
|-----------------------------------|---------------------------------------------------------------------------------------------------------------------------------------------------------------------------------------------------------------|---------------------------------|-----------------------------|---------------------------------------------------------------------------------------------------------------------------------------------------------------------------------------------------------|------------------------------------------------------------------------------------------------------------------------------------------------|--------------------------------------------------------------------------------------------------------------------------------------------------------------------------------------------------------------------------------------|-----------------------------------------------------------------------------------------------------------------------------------------------------------------------------------------------------------------------------------------------------------------------------------------------------------------|
|                                   | Ontario Provincial Police                                                                                                                                                                                     | Law enforcement                 | Investigation reports       | Investigative reports of theft or loss of controlled drugs (opioids, narcotics, stimulants or other controlled drugs) from hospitals in Northwestern Ontario detachments                                | January 2015 to June 2017                                                                                                                      | 2 loss reports                                                                                                                                                                                                                       | On advice from database custodian, scope was reduced from the entire province to a single region; Northwestern region was selected on the recommendation of a project informant.                                                                                                                                |
| Direct query                      | Canadian Medication Incident Reporting Program (CMIRPS):<br>- Individual Practitioner Reporting (IPR),<br>- Consumer reporting program (consumer),<br>- Community Pharmacy Incident Reporting Program (CPhIR) | Error reporting system          | Medication incident reports | abuse, misuse, addict*, diver* (for divert, diversion, diverting), steal* (for steal, stealing), stole* (for stole, stolen), hid* (for hide, hidden), cheek*, workaround, access, illicit, forge, theft | Database initiation to June 30, 2017<br><br>Initiation date of each database:<br>IPR, August 2000<br>Consumer, March 2010<br>CPhIR, April 2010 | 350 reports reviewed (217 from IPR, 15 from consumer program, 118 from CPhIR)<br><br>18 eligible reports of opportunity, tampering, suspected diversion or diversion from IPR<br><br>No eligible data from consumer or CPhIR reports | Most data in CMIRPS is reported voluntarily; as such, it likely under-represents actual cases of diversion.<br><br>Search was not limited to controlled drugs because of limitations with database search functionality; reports unrelated to controlled drugs were manually excluded after the search was run. |
| Manual review of discipline cases | College of Nurses of Ontario                                                                                                                                                                                  | Professional practice regulator | Disciplinary records        | Manual review of cases relating to controlled-drug theft or diversion                                                                                                                                   | 2005 to 2017                                                                                                                                   | 244 disciplinary records, of which 10 were eligible (6 describing diversion from a hospital, 4 describing diversion from unknown facility type, possibly a hospital)                                                                 | Data collection was limited to 2005 onward to 1) limit the scope of time-consuming manual review and 2) match the timeframe of the scoping review.                                                                                                                                                              |

Appendix for “Opioid losses in terms of dosage and cost: a retrospective analysis of Health Canada data”

Authors: Fan, Tscheng, Hamilton, Trbovich

| Manner of request | Organization Name and Database Name (if applicable)                               | Organization Type               | Expected holdings                | Search terms or request                                                                                                                                                                                 | Time limits             | Quantitative data                                                             | Comments                                                                                                                                                                                         |
|-------------------|-----------------------------------------------------------------------------------|---------------------------------|----------------------------------|---------------------------------------------------------------------------------------------------------------------------------------------------------------------------------------------------------|-------------------------|-------------------------------------------------------------------------------|--------------------------------------------------------------------------------------------------------------------------------------------------------------------------------------------------|
|                   | College of Physicians and Surgeons of Ontario (CPSO)                              | Professional practice regulator | Disciplinary records             | Manual review of cases relating to controlled-drug theft or diversion                                                                                                                                   | 2013 to 2017            | 176 disciplinary records reviewed, of which 5 cases were eligible             | At the time of the manual review, disciplinary reports mentioned in CPSO news releases were available for 2013 onward.                                                                           |
|                   | Royal College of Dental Surgeons of Ontario                                       | Professional practice regulator | Disciplinary records             | Manual review of cases relating to controlled-drug theft or diversion                                                                                                                                   | 2004 to 2017            | 120 disciplinary records reviewed; no relevant cases found                    |                                                                                                                                                                                                  |
|                   | College of Dental Hygienists of Ontario                                           | Professional practice regulator | Disciplinary records             | Internal review of disciplinary records relating to controlled-drug theft or diversion                                                                                                                  | No restriction          | 54 disciplinary records reviewed; no relevant cases found                     |                                                                                                                                                                                                  |
| Direct inquiry    | Ontario College of Pharmacists (OCP)                                              | Professional practice regulator | Disciplinary records             | Internal review of disciplinary records relating to controlled-drug theft or diversion                                                                                                                  | No restriction          | Response received, but no records pertained to hospital settings <sup>a</sup> | All pharmacists and community pharmacies are regulated by the OCP; however, hospital pharmacies have only recently (in 2016) fallen under its jurisdiction.                                      |
|                   | College of Respiratory Therapists of Ontario                                      | Professional practice regulator | Disciplinary records             | Internal review of disciplinary records relating to controlled-drug theft or diversion                                                                                                                  | No restriction          | 2 disciplinary records; no relevant cases found                               |                                                                                                                                                                                                  |
|                   | Canadian Institute for Health Information: National System for Incident Reporting | Error reporting system          | Medication incident report forms | abuse, misuse, addict*, diver* (for divert, diversion, diverting), steal* (for steal, stealing), stole* (for stole, stolen), hid* (for hide, hidden), cheek*, workaround, access, illicit, forge, theft | April 2010 to June 2017 | 94 reports received, of which 7 were eligible                                 | Search was not limited to controlled drugs because of limitations with the database search functionality; Reports unrelated to controlled drugs were manually excluded after the search was run. |

## Appendix for “Opioid losses in terms of dosage and cost: a retrospective analysis of Health Canada data”

Authors: Fan, Tscheng, Hamilton, Trbovich

| Manner of request | Organization Name and Database Name (if applicable) | Organization Type        | Expected holdings                    | Search terms or request                                                                | Time limits    | Quantitative data | Comments                                                                             |
|-------------------|-----------------------------------------------------|--------------------------|--------------------------------------|----------------------------------------------------------------------------------------|----------------|-------------------|--------------------------------------------------------------------------------------|
|                   | Canadian Association of Physician Assistants        | Association <sup>b</sup> | Disciplinary records                 | Internal review of disciplinary records relating to controlled-drug theft or diversion | No restriction |                   | Response received, but indicated there was no evidence of diversion in their records |
|                   | Hospital #1                                         | Teaching hospital        | Incident reports and/or loss reports | Incident reports and/or loss reports related to controlled-drug diversion or theft     | No restriction |                   | Response received, but organization declined to release data                         |
|                   | Hospital #2                                         | Community hospital       | Incident reports and/or loss reports | Incident reports and/or loss reports related to controlled-drug diversion or theft     | No restriction |                   | Response received, but organization declined to release data                         |

**Source:** Authors' analysis of data from multiple Canadian organizations as described above.

<sup>a</sup>Reports were available from community pharmacies, but the Ontario College of Pharmacists have only recently begun the process of accrediting hospital pharmacies in 2016; no hospital reports were found during our search.

<sup>b</sup>No regulatory college for this profession exists in Ontario

Appendix for “Opioid losses in terms of dosage and cost: a retrospective analysis of Health Canada data”  
Authors: Fan, Tscheng, Hamilton, Trbovich

Health Canada’s mandatory theft or loss report forms represented the largest repository of data regarding controlled-drug diversion from hospital settings. The Freedom of Information request to Health Canada for 2016 data generated more records than any other database source, revealing 556 reports of controlled-drug loss or theft (some involving multiple products) in Ontario alone. This large number contrasts starkly with the number of reports collected from health professionals’ regulatory colleges, law enforcement agencies and other national insurance organizations, even with multi-year searches. Regulatory colleges for health professionals often pointed to publicly available disciplinary records on their websites, but in some cases, the regulatory college internally searched its own records and provided results. Other organizational databases did not contain a substantial number of reports related to controlled-drug diversion in hospital settings.

## Limitations

Manual review of some database reports may not have captured all relevant cases; in addition, it is possible that the same incident was reported in multiple databases, and such duplication might not have been recognized from the report details available to reviewers.

## 2. Milligram Calculation Procedure used on Health Canada Dataset

This section describes the process used to calculate the quantity of controlled drugs lost from Canadian healthcare sources. We report this quantity in milligrams, oral morphine equivalents, and daily defined doses.

The original dataset is hosted on a web-based service, GitHub: [https://github.com/taracarman/drug\\_losses](https://github.com/taracarman/drug_losses)

The dataset was uploaded by Tara Carman, who also authored a CBC News article on June 28, 2018,<sup>2,3</sup> where we first became aware of the dataset.

This dataset was acquired from Health Canada following an Access to Information Request, and describes losses of controlled drugs from January 1, 2012 to September 30, 2017.<sup>4</sup>

The original dataset is comprised of 142,421 rows, and 8 columns. The columns include:

- Date of loss (e.g., 12-01-01)
- Province where loss is reported (e.g., Alberta)
- Drug name (e.g., Hydromorph Contin 24mg Cap)
- Generic drug name (e.g., Hydromorphone)
- Quantity of loss (e.g., 2)
- Unit of loss (e.g., Capsule)
- Loss Description (e.g., Loss Unexplained)
- Facility Type (e.g., Hospital)

For the purposes of our analysis, we filtered the ‘Generic drug name’ column to focus on five common opioids:

- Codeine or ‘Codeine & Butalbital’ or ‘Codeine & Phenobarbital’
- Fentanyl
- Hydromorphone or Hydromorphine
- Morphine or ‘Morphine Sulfate’
- Oxycodone

This reduced the dataset to 64,693 rows.



Appendix for “Opioid losses in terms of dosage and cost: a retrospective analysis of Health Canada data”  
 Authors: Fan, Tscheng, Hamilton, Trbovich

In the bullets above, we provided an example of a loss from January 1, 2012, where 2 capsules of Hydromorphone Contin were lost from a hospital in Alberta. The following section continues to use this example to show the additional calculations we performed.

One pharmacist (DT), four pharmacy students (DL, LD, EB, and KR worked collaboratively to add several columns to the spreadsheet to further analyze these reports:

1. The year of the loss (as opposed to the full date) (i.e., 2012)
2. The drug route (e.g., oral, oral solution, injectable, patch, suppository, unknown)
3. The quantity of milligrams per ‘unit’ of quantity (i.e., 2mg per capsule lost)
4. The total milligrams lost in that row (quantity column times the milligrams per unit quantity) (i.e., 2 capsules times 2 mg/capsule = 4 milligrams lost in total)
5. The oral morphine equivalent (OMEQ) of the total milligram loss (i.e., the conversion factor from oral hydromorphone to oral morphine is 5, so 4mg times 5 = 20 oral morphine equivalents lost)
6. The daily defined dose (DDD) equivalent of the total milligram loss (i.e., the World Health Organization (WHO) defines 1 daily defined dose of oral hydromorphone as 20mg, so in this case, 1 DDD was lost)
7. A notes column to describe how the row was altered if the original data was ambiguous and required editing. (i.e., in this case, no anomalies were encountered so no note would be written).

We encountered a variety of rows where a straightforward calculation was not possible, or suspect. We made several assumptions, generally seeking to estimate a reasonable lower limit for the drug lost (i.e., we attempted to be more conservative in our estimates of drug loss).

Table A3 summarizes the anomalous reports we encountered, and how we addressed them.

**Table A3. Strategy for Anomalous Reports**

| Description of Anomalous Report                                                                                                                        | Resolution                                                                                                                                                                                                                                                                                                            |
|--------------------------------------------------------------------------------------------------------------------------------------------------------|-----------------------------------------------------------------------------------------------------------------------------------------------------------------------------------------------------------------------------------------------------------------------------------------------------------------------|
| The ‘Drug name’ conflicted with the ‘Unit of loss’ (e.g., fentanyl patches were reported with losses of millilitres)                                   | In the majority of cases, we used the drug strength described in the ‘Drug name’ column to calculate the milligrams lost.                                                                                                                                                                                             |
| Units of loss were reported in ‘packages’ (it was unclear what size of package was lost)                                                               | We searched Health Canada’s Drug Product Database (DPD), reviewed relevant product monographs, selected the smallest package size, and used this to calculate the quantity of milligrams lost per package.                                                                                                            |
| Units of loss are high (e.g., kilograms or litres)                                                                                                     | We left these reports as is, assuming they were reported accurately. Exceptions are noted in the ‘notes’ column.                                                                                                                                                                                                      |
| Quantities of losses exceed what would typically be held by a facility of that type (e.g., 165,997 tablets of 5mg oxycodone were lost from a pharmacy) | It is possible this report was the discovery of losses over a long period of time. As a result, we generally left these reports untouched.                                                                                                                                                                            |
| No concentration was reported in the ‘Drug name’ column (e.g., ‘Oxycodone’ provides no details on the dosage format or strength)                       | In these cases, we looked to the unit of loss, where some rows provided clues (e.g., unit of loss is reported in Capsules or Tablets, suggesting an oral route). The pharmacy reviewers sought out the drug strength manually, where possible, using the DPD and relevant product monographs. When unclear, we used a |

Appendix for “Opioid losses in terms of dosage and cost: a retrospective analysis of Health Canada data”  
 Authors: Fan, Tscheng, Hamilton, Trbovich

|                                                                        |                                                                                                                                                                                                                                    |
|------------------------------------------------------------------------|------------------------------------------------------------------------------------------------------------------------------------------------------------------------------------------------------------------------------------|
|                                                                        | 1 mg/quantity lost as a conservative measure of loss. Where the pharmacy reviewers felt reasonable, the drug strength was altered and a note is provided in these cases.                                                           |
| Reported concentration in drug name is not available as a drug product | We reduced to the lowest concentration (e.g., Hydromorphone HP 30mg/mL reduced to 10mg/mL).                                                                                                                                        |
| Quantity of reported loss is zero                                      | Since these rows have no impact on our total, we left them as is.                                                                                                                                                                  |
| Unclear what unit of loss is (e.g., MF)                                | We assumed these rows referred to milligram losses and treated them as such.                                                                                                                                                       |
| Drug route cannot be determined                                        | We treated these rows as oral medications for all analytical purposes (e.g., OMEQ and DDD calculations). They are labelled as ‘unknown’ in the route column of the dataset, and are referred to as ‘indeterminate’ in the article. |

Source: Authors’ description of calculation methodology.

Our analytical dataset is available online as a supplemental file and accompanies this article. Interested readers can open the original dataset from CBC, and find the corresponding row in our analytical dataset to see how we altered the row. We believe this maximizes transparency and should allow for further analyses, reviews, or critiques for those who are interested.

### 3. Conversion Factors for Oral Morphine Equivalents and Daily Defined Doses

We have tabulated conversion factors from existing literature where possible, but please note there are inconsistencies between sources.

**The conversion factors provided in this Appendix are not for clinical use.** They represent an academic attempt to characterize opioid losses from Canadian facilities and allow policy-makers to approximate and/or benchmark the losses against other values.

We have attempted to use the same conversion factors as the Canadian Institute of Health Information (CIHI) where possible.<sup>5</sup> However, CIHI focuses primarily on oral and transdermal drug formats, and therefore additional sources were used in the analysis of our dataset (see references associated with each factor below).

**Table A4**

| <b>Oral Morphine Equivalent (OMEQ) Conversion Factors</b>                                     |                        |                                                                               |
|-----------------------------------------------------------------------------------------------|------------------------|-------------------------------------------------------------------------------|
| Drug and Route <sup>a</sup><br>(assuming drug in question is being converted from milligrams) | OMEQ Conversion Factor | Notes and References                                                          |
| <b>Codeine</b>                                                                                |                        |                                                                               |
| Oral                                                                                          | 0.15                   | Based on conversion factors published by CIHI and Busse et al. <sup>5,6</sup> |

Appendix for “Opioid losses in terms of dosage and cost: a retrospective analysis of Health Canada data”  
 Authors: Fan, Tscheng, Hamilton, Trbovich

|                      |      |                                                                                                                                                                                                                                                                                                                                                      |
|----------------------|------|------------------------------------------------------------------------------------------------------------------------------------------------------------------------------------------------------------------------------------------------------------------------------------------------------------------------------------------------------|
| Injectable           | 0.25 | Based on conversion factors published by Nielsen et al. <sup>7</sup>                                                                                                                                                                                                                                                                                 |
| <b>Fentanyl</b>      |      |                                                                                                                                                                                                                                                                                                                                                      |
| Oral (sublingual)    | 130  | Based on conversion factors published by CDC. <sup>8</sup>                                                                                                                                                                                                                                                                                           |
| Injectable           | 100  | Based on conversion factors published by CDC. <sup>8</sup>                                                                                                                                                                                                                                                                                           |
| Patch                | 100  | Based on conversion factors published by CDC. <sup>8</sup> Factor of 100 assumes 3 days worth of drug, and uses parenteral conversion factor. For example, 100mcg/h * 72 hours = 7200mcg delivered over 3 days; 7.2 mg x 100 (conversion factor in row above) = 720mg of OMEQ per patch).                                                            |
| <b>Hydromorphone</b> |      |                                                                                                                                                                                                                                                                                                                                                      |
| Oral                 | 5    | Based on conversion factors published by CIHI and Busse et al. <sup>5,6</sup>                                                                                                                                                                                                                                                                        |
| Injectable           | 17.5 | Based on conversion factors published by Nielsen et al. <sup>7</sup>                                                                                                                                                                                                                                                                                 |
| Rectal (suppository) | 6    | There are no widely accepted conversion factors for rectal hydromorphone to oral morphine. However, for the purposes of this article, we have attempted to estimate using studies investigating morphine.                                                                                                                                            |
|                      |      | Both rectal and oral formulations are technically enteral, and the few studies investigating show close effectiveness in pain relief between oral and rectal routes. <sup>9</sup>                                                                                                                                                                    |
|                      |      | Bruera et al. (1995) shows that morphine equivalence between rectal and subcutaneous (injectable) morphine is 2.5 to 1, <sup>10</sup> and Nielsen et al. (2016) states that injectable morphine is 3 times stronger than oral morphine. <sup>7</sup> Therefore, we estimate that 1 mg of rectal morphine is equal to 1.2mg (3/2.5) of oral morphine. |
|                      |      | Mercadante et al. (2005) shows 1mg of rectal tramadol is roughly equivalent to 1.5mg of oral tramadol. <sup>11</sup>                                                                                                                                                                                                                                 |
|                      |      | Therefore, we anticipate that rectal routes are slightly more efficient (more powerful) than oral routes.                                                                                                                                                                                                                                            |
|                      |      | Using Bruera et al.’s conversion values for morphine as a benchmark for our calculations, we estimate that 1mg of rectal hydromorphone is equivalent to 1.2 milligrams of oral hydromorphone. Therefore, 1mg of rectal                                                                                                                               |

Appendix for "Opioid losses in terms of dosage and cost: a retrospective analysis of Health Canada data"  
 Authors: Fan, Tscheng, Hamilton, Trbovich

hydromorphone is 6mg (5\*1.2) of oral morphine.

| <b>Morphine</b>         |     |                                                                                                                                                                                                                                      |
|-------------------------|-----|--------------------------------------------------------------------------------------------------------------------------------------------------------------------------------------------------------------------------------------|
| Oral                    | 1   | Based on conversion factors published by CIHI and Busse et al. <sup>5,6</sup>                                                                                                                                                        |
| Injectable              | 3   | Based on conversion factors published by Nielsen et al. <sup>7</sup>                                                                                                                                                                 |
| Rectal<br>(suppository) | 1.2 | Bruera treated rectal to subcutaneous (injectable) morphine at 2.5:1. <sup>10</sup> Nielsen does injectable to oral morphine at 3 to 1. <sup>7</sup> Therefore we consider the conversion factor for rectal to oral is $3/2.5 = 1.2$ |

| <b>Oxycodone</b> |     |                                                                                                                                                                                                                                              |
|------------------|-----|----------------------------------------------------------------------------------------------------------------------------------------------------------------------------------------------------------------------------------------------|
| Oral             | 1.5 | Based on conversion factors published by CIHI and Busse et al. <sup>5,6</sup>                                                                                                                                                                |
| Rectal           | 1.8 | This conversion factor is based on the same rationale for rectal hydromorphone. In short, rectal morphine has been estimated to be 1.2 times as strong as oral morphine; this has been extrapolated to oxycodone (i.e., $1.5 * 1.2 = 1.8$ ). |

<sup>a</sup>Reports where the dosage format was unknown were treated as 'oral' for the purposes of the OMEQ conversion.

**Table A5**

**Daily Defined Dose (DDD) Conversion Factors**

| Drug and Dosage Format <sup>a</sup>                                                                                                                                                                                                                                                                                      | DDD    | Notes and References                                                                                                                                               |
|--------------------------------------------------------------------------------------------------------------------------------------------------------------------------------------------------------------------------------------------------------------------------------------------------------------------------|--------|--------------------------------------------------------------------------------------------------------------------------------------------------------------------|
| <b>Codeine</b>                                                                                                                                                                                                                                                                                                           |        |                                                                                                                                                                    |
| Oral                                                                                                                                                                                                                                                                                                                     | 240mg  | International narcotics control board has defined the DDD for analgesic use of codeine at 240mg. <sup>12</sup> This value has also been used by CIHI. <sup>5</sup> |
| Injectable                                                                                                                                                                                                                                                                                                               | 64mg   | NO DDD has been defined by the World Health Organization (WHO) for injectable codeine.                                                                             |
| Note that in other injectable DDDs, the DDD is 2.5 (oxycodone) to 5 (hydromorphone) times lower than the oral DDD. As an average between hydromorphone and oxycodone, we divided the oral DDD by 3.75 to approximate a reasonable DDD. In this case, parenteral codeine DDD would be $240\text{mg}/3.75 = 64\text{mg}$ . |        |                                                                                                                                                                    |
| <b>Fentanyl</b>                                                                                                                                                                                                                                                                                                          |        |                                                                                                                                                                    |
| Oral (sublingual)                                                                                                                                                                                                                                                                                                        | 0.6mg  | DDD defined by WHO. <sup>13</sup>                                                                                                                                  |
| Injectable                                                                                                                                                                                                                                                                                                               | 0.16mg | NO DDD has been defined by the WHO for injectable fentanyl.                                                                                                        |
| Using the rationale for codeine above, the injectable                                                                                                                                                                                                                                                                    |        |                                                                                                                                                                    |

Appendix for “Opioid losses in terms of dosage and cost: a retrospective analysis of Health Canada data”  
 Authors: Fan, Tscheng, Hamilton, Trbovich

1  
2  
3  
4  
5  
6  
7  
8  
9  
10  
11  
12  
13  
14  
15  
16  
17  
18  
19  
20  
21  
22  
23  
24  
25  
26  
27  
28

fentanyl DDD would be  $0.6\text{mg}/3.75 = 0.16\text{mg}$ .  
 DDD defined by WHO.<sup>13</sup>

|                         |       |                                                                                                                                                                                                                                                                  |
|-------------------------|-------|------------------------------------------------------------------------------------------------------------------------------------------------------------------------------------------------------------------------------------------------------------------|
| Transdermal             | 1.2mg |                                                                                                                                                                                                                                                                  |
| <b>Hydromorphone</b>    |       |                                                                                                                                                                                                                                                                  |
| Oral                    | 20mg  | DDD defined by WHO. <sup>13</sup>                                                                                                                                                                                                                                |
| Injectable              | 4mg   | DDD defined by WHO. <sup>13</sup>                                                                                                                                                                                                                                |
| Rectal<br>(suppository) | 4mg   | DDD defined by WHO. <sup>13</sup>                                                                                                                                                                                                                                |
| <b>Morphine</b>         |       |                                                                                                                                                                                                                                                                  |
| Oral                    | 100mg | DDD defined by WHO. <sup>13</sup>                                                                                                                                                                                                                                |
| Injectable              | 30mg  | DDD defined by WHO. <sup>13</sup>                                                                                                                                                                                                                                |
| Rectal<br>(suppository) | 30mg  | DDD defined by WHO. <sup>13</sup>                                                                                                                                                                                                                                |
| <b>Oxycodone</b>        |       |                                                                                                                                                                                                                                                                  |
| Oral                    | 75mg  | DDD defined by WHO. <sup>13</sup>                                                                                                                                                                                                                                |
| Injectable              | 30mg  | DDD defined by WHO. <sup>13</sup>                                                                                                                                                                                                                                |
| Rectal                  | 30mg  | NO DDD has been defined by the WHO for rectal oxycodone. However, WHO has defined a parenteral oxycodone DDD of 30mg. Since DDDs for rectal are the same as the DDD for parenteral in other instances (see morphine and hydromorphone), we have used 30 mg here. |

29  
30  
31  
32  
33  
34  
35  
36  
37  
38  
39  
40  
41  
42  
43  
44  
45  
46  
47  
48  
49  
50  
51  
52  
53  
54  
55  
56  
57  
58  
59  
60

<sup>a</sup>Reports where the dosage format was unknown were treated as ‘oral’ for the purposes of the DDD conversion.

Appendix for “Opioid losses in terms of dosage and cost: a retrospective analysis of Health Canada data”  
 Authors: Fan, Tscheng, Hamilton, Trbovich

#### 4. Street Pricing Estimates

The street values of pharmaceutical opioids are subject to significant variability (e.g., potency, formulation, bulk purchasing).<sup>14</sup> However, literature suggests that street pricing accurately reflects equianalgesic potency,<sup>14,15</sup> which supports our contention that reporting losses in terms of dose (e.g., milligrams) or potency (e.g., oral morphine equivalents) is superior to alternative forms of measurement (e.g., dosage units, incidents of loss).

Given the lack of consensus regarding street price per drug per milligram, we used the average price per milligram as provided by a Provincial Policing Service to estimate street value (Table A6). This average price per milligram was used regardless of the dosage format with the exception of fentanyl. The street pricing for fentanyl varied between transdermal and other formats, so Table A6 shows different pricing for these formats.

Previous Canadian literature on street pricing is outdated,<sup>16</sup> and newer articles often describe street pricing in the US (reported in US dollars); it is unclear if street pricing varies considerably between the US and Canada. Pricing is typically reported for oral formats, but it is unclear how accurately this represents other formats (e.g., injectable, transdermal, rectal).

**Table A6**

| Estimates of Street Pricing |                                                          |                                                                                                                                                                                                                                                                                                                                                                                                                                                                                                                                                                                        |
|-----------------------------|----------------------------------------------------------|----------------------------------------------------------------------------------------------------------------------------------------------------------------------------------------------------------------------------------------------------------------------------------------------------------------------------------------------------------------------------------------------------------------------------------------------------------------------------------------------------------------------------------------------------------------------------------------|
| Drug                        | Price range estimated by Ontario Provincial Police       | Additional Notes and References                                                                                                                                                                                                                                                                                                                                                                                                                                                                                                                                                        |
| Codeine                     | \$1 to 1.25 per milligram (average \$1.125/mg)           | Street price not reported in literature.                                                                                                                                                                                                                                                                                                                                                                                                                                                                                                                                               |
| Fentanyl (oral, injectable) | \$0.3 to 0.5 per milligram (average \$0.4/mg)            | The values provided by the Ontario Provincial Police are for powdered fentanyl, which likely underestimates street prices for fentanyl tablets.<br><br>For example, the US Drug Enforcement Administration has used 1.5 to 1.8mg as possible doses per counterfeit fentanyl tablets, and has provided estimates of sale prices ranging from \$10 to \$20 USD per pill. <sup>17</sup> Therefore, the actual dose in counterfeit pills could be valued between \$5.5 to \$13.3 USD per milligram. <b>This is ten to thirty times higher than the conservative estimate we have used.</b> |
| Fentanyl (transdermal)      | \$1 to 3 per microgram per hour (average \$2 per mcg/hr) | Fentanyl patch street pricing has been estimated at USD \$1/mcg/hr. <sup>18</sup>                                                                                                                                                                                                                                                                                                                                                                                                                                                                                                      |
| Hydromorphone               | \$1 to 2 per milligram (average \$1.5/mg)                | Crowdsourced street pricing ranges from \$3.55 to 4.47 USD per milligram. <sup>15</sup>                                                                                                                                                                                                                                                                                                                                                                                                                                                                                                |
| Morphine                    | \$0.66 to 1 per milligram                                | Crowdsourced street pricing ranges from \$0.42 to 0.67                                                                                                                                                                                                                                                                                                                                                                                                                                                                                                                                 |

Appendix for “Opioid losses in terms of dosage and cost: a retrospective analysis of Health Canada data”  
 Authors: Fan, Tscheng, Hamilton, Trbovich

|           |                           |                                                        |
|-----------|---------------------------|--------------------------------------------------------|
|           | (average \$0.83/mg)       | USD per milligram. <sup>15</sup>                       |
| Oxycodone | \$0.50 to 2 per milligram | Crowdsourced street pricing ranges from \$0.86 to 0.99 |
|           | (average \$1.25/mg)       | USD per milligram. <sup>15</sup>                       |

**Source:** Data provided by Ontario Provincial Police and literature as cited.

## 5. Opioid Milligram Losses for Pharmacies by Canadian Province/Territory (Major Loss Categories only)

This section examines the dominant reasons for loss in pharmacies and hospitals respectively, broken down by province and territory, in descending order of milligrams lost.

Ontario pharmacies show an increasing trend of armed robberies and unexplained losses, but a downward trend in break and enter and pilferage. Alberta pharmacies show a reduction in losses from armed robberies, but a recent upward trend in unexplained losses. BC pharmacies show an astonishing downward trend in losses from armed robbery and break and entry. Newfoundland and Labrador (NL) is ranked fourth in terms of total losses from pharmacies in the dataset, losing over 6kg of the five opioids in our analysis; this is an average of 1.89mg per capita, compared to Ontario, British Columbia and Alberta, which range from 0.5 to 0.7mg per capita.<sup>19</sup> Saskatchewan and Manitoba have seen increasing amounts of unexplained losses in 2016 and 2017.

**Table A7**

### Pharmacy Milligram Losses By Year and by Dominant Loss Description for each Province/Territory in order of Largest to Smallest Milligram Losses (Jan 2012 to Sept 2017)

|                         | 2012      | 2013      | 2014      | 2015      | 2016      | 2017 (up to Sept. only) |
|-------------------------|-----------|-----------|-----------|-----------|-----------|-------------------------|
| <b>Ontario</b>          |           |           |           |           |           |                         |
| Armed Robbery           | 2,548,985 | 2,330,881 | 2,188,001 | 2,592,363 | 1,823,099 | 4,341,288               |
| Break and Entry         | 1,669,073 | 942,251   | 3,038,883 | 1,291,617 | 546,219   | 618,799                 |
| Loss                    |           |           |           |           |           |                         |
| Unexplained             | 536,416   | 608,142   | 408,980   | 666,368   | 1,824,123 | 3,002,302               |
| Pilferage               | 2,816,645 | 226,533   | 2,591,775 | 2,451,156 | 1,517,376 | 532,015                 |
| <b>Alberta</b>          |           |           |           |           |           |                         |
| Armed Robbery           | 615,440   | 899,115   | 1,204,313 | 619,595   | 538,780   | 123,365                 |
| Break and Entry         | 988,964   | 460,809   | 1,158,541 | 3,471,349 | 1,505,720 | 1,089,889               |
| Loss                    |           |           |           |           |           |                         |
| Unexplained             | 163,664   | 103,481   | 329,089   | 238,729   | 885,076   | 1,527,698               |
| Pilferage               | 177,270   | 453,095   | 5,840     | 43,240    | 10,467    | 8,324                   |
| <b>British Columbia</b> |           |           |           |           |           |                         |

Appendix for "Opioid losses in terms of dosage and cost: a retrospective analysis of Health Canada data"  
 Authors: Fan, Tscheng, Hamilton, Trbovich

|                                  |           |           |           |           |           |           |
|----------------------------------|-----------|-----------|-----------|-----------|-----------|-----------|
| Armed Robbery                    | 2,501,598 | 1,476,241 | 1,159,592 | 1,305,586 | 8600      | 72        |
| Break and Entry                  | 752,315   | 1,236,488 | 1,200,863 | 350,460   | 28,341    | 14,400    |
| Loss                             |           |           |           |           |           |           |
| Unexplained                      | 159,674   | 83,621    | 184,072   | 110,938   | 2,141,798 | 1,073,561 |
| Pilferage                        | -         | 24,292    | 12,750    | 4,150     | 12,560    | 19,629    |
| <b>Newfoundland and Labrador</b> |           |           |           |           |           |           |
| Armed Robbery                    | 135,193   | 68,055    | 168,541   | 62,283    | 838,005   | 256,595   |
| Break and Entry                  | 44,550    | 221,791   | 262,133   | 936,148   | 216,153   | 206,209   |
| Loss                             |           |           |           |           |           |           |
| Unexplained                      | 119,645   | 861       | 6,947     | 14,649    | 50,592    | 47,880    |
| Pilferage                        | -         | 1,010     | -         | 82,860    | 2,276,750 | -         |
| <b>Quebec</b>                    |           |           |           |           |           |           |
| Armed Robbery                    | 363,585   | 113,785   | 296,879   | 82,213    | 91,300    | 12,685    |
| Break and Entry                  | 97,367    | 98,677    | 297,084   | 153,512   | 192,260   | 48,381    |
| Loss                             |           |           |           |           |           |           |
| Unexplained                      | 38,664    | 48,158    | 70,229    | 194,565   | 133,079   | 152,992   |
| Pilferage                        | 323,370   | 164,231   | 26,795    | 656,670   | 426,301   | 124,605   |
| <b>Saskatchewan</b>              |           |           |           |           |           |           |
| Armed Robbery                    | 19,115    | 172,774   | 20,690    | 179,880   | 106,769   | 205,917   |
| Break and Entry                  | 725,734   | 319,453   | 361,435   | 440,172   | 299,346   | 338,045   |
| Loss                             |           |           |           |           |           |           |
| Unexplained                      | 67,647    | 83,247    | 20,533    | 113,097   | 204,236   | 224,138   |
| Pilferage                        | 478       | -         | 1,960     | 282,826   | 1,209     | 2,415     |
| <b>Manitoba</b>                  |           |           |           |           |           |           |
| Armed Robbery                    | 15,720    | -         | 132,486   | 61,910    | 900       | 15,458    |
| Break and Entry                  | -         | 60,229    | -         | 66,578    | 1,698     | 6,040     |
| Loss                             |           |           |           |           |           |           |
| Unexplained                      | 30,649    | 4,510     | 17,084    | 15,326    | 160,383   | 150,742   |
| Pilferage                        | -         | 21,600    | 3,400     | -         | -         | -         |
| <b>Nova Scotia</b>               |           |           |           |           |           |           |
| Armed Robbery                    | 428       | 195       | 578       | 180       | 13        | 685       |
| Break and Entry                  | 11454     | -         | 4720      | -         | -         | -         |
| Loss                             |           |           |           |           |           |           |
| Unexplained                      | 490       | 976       | 1303      | 2024      | 782       | 1095      |
| Pilferage                        | 426       | -         | 4389      | -         | -         | -         |
| <b>New Brunswick</b>             |           |           |           |           |           |           |
| Armed Robbery                    | 330       | -         | 1398      | 1218      | 45        | 773       |
| Break and Entry                  | -         | 687       | -         | 936       | 22        | 255       |
| Loss                             |           |           |           |           |           |           |
| Unexplained                      | 311       | 61        | 628       | 126       | 1741      | 1395      |
| Pilferage                        | -         | 1080      | 50        | -         | -         | -         |
| <b>Yukon</b>                     |           |           |           |           |           |           |



Appendix for "Opioid losses in terms of dosage and cost: a retrospective analysis of Health Canada data"  
 Authors: Fan, Tscheng, Hamilton, Trbovich

| <b>Territories</b>           |     |         |        |       |        |        |
|------------------------------|-----|---------|--------|-------|--------|--------|
| Armed Robbery                | -   | -       | -      | -     | -      | 560    |
| Break and Entry              | -   | 125,761 | -      | -     | -      | -      |
| Loss                         | -   | 262     | 5      | -     | 29,591 | 68,987 |
| Unexplained                  | -   | -       | -      | -     | -      | -      |
| Pilferage                    | -   | -       | -      | -     | -      | 560    |
| <b>Prince Edward Island</b>  |     |         |        |       |        |        |
| Armed Robbery                | -   | -       | -      | -     | -      | -      |
| Break and Entry              | -   | -       | 69,719 | 500   | -      | -      |
| Loss                         | -   | 5,400   | 2,180  | 2,112 | 4,078  | 1,856  |
| Unexplained                  | -   | -       | -      | -     | -      | -      |
| Pilferage                    | -   | 70      | -      | -     | -      | -      |
| <b>Nunavut</b>               |     |         |        |       |        |        |
| Armed Robbery                | -   | -       | -      | -     | -      | -      |
| Break and Entry              | -   | -       | -      | -     | -      | -      |
| Loss                         | -   | 270     | 6,323  | 300   | 8,930  | -      |
| Unexplained                  | -   | -       | -      | -     | -      | -      |
| Pilferage                    | -   | -       | 2,888  | -     | -      | -      |
| <b>Northwest Territories</b> |     |         |        |       |        |        |
| Armed Robbery                | -   | -       | -      | -     | -      | -      |
| Break and Entry              | -   | -       | -      | -     | -      | -      |
| Loss                         | 148 | 3,619   | 8,330  | 600   | 664    | 847    |
| Unexplained                  | -   | -       | -      | -     | -      | -      |
| Pilferage                    | -   | -       | -      | -     | -      | -      |

**Source:** Authors' analysis of data for Jan. 2012 to Sept. 2017 from reports of Controlled Substances Loss or Theft Reports to Health Canada as published by CBC News in June 2018.

Appendix for "Opioid losses in terms of dosage and cost: a retrospective analysis of Health Canada data"  
 Authors: Fan, Tscheng, Hamilton, Trbovich

## 6. Opioid Milligram Losses for Hospitals by Canadian Province/Territory (Major Loss Categories only)

This section examines the dominant reasons for hospitals, broken down by province and territory, in descending order of milligrams lost.

Ontario hospitals show a rapid increase in pilferage losses starting in 2016. Other provinces and territories show no clear trends, but Quebec and Manitoba hospitals show peaks in milligram losses in 2016 and 2015, respectively.

**Table A8**

**Hospital Milligram Losses By Year and by Dominant Loss Description for each Province/Territory in order of Largest to Smallest Milligram Losses (Jan 2012 to Sept 2017)**

|                                  | 2012   | 2013   | 2014   | 2015    | 2016    | 2017 (up to Sept. only) |
|----------------------------------|--------|--------|--------|---------|---------|-------------------------|
| <b>Ontario</b>                   |        |        |        |         |         |                         |
| Loss                             |        |        |        |         |         |                         |
| Unexplained                      | 10,408 | 36,746 | 19,205 | 26,657  | 27,576  | 7,844                   |
| Pilferage                        | 24,226 | 28,952 | 21,552 | 12,736  | 120,645 | 415,879                 |
| <b>Quebec</b>                    |        |        |        |         |         |                         |
| Loss                             |        |        |        |         |         |                         |
| Unexplained                      | 38,265 | 14,761 | 6,760  | 10,176  | 7,479   | 4,920                   |
| Pilferage                        | 2,342  | 2,675  | 1,532  | 382     | 70,287  | 27,169                  |
| <b>Manitoba</b>                  |        |        |        |         |         |                         |
| Loss                             |        |        |        |         |         |                         |
| Unexplained                      | 1,747  | 173    | 144    | 121,547 | 508     | 3,169                   |
| Pilferage                        | 1,423  | 32,533 | 2,165  | -       | 13,227  | 100                     |
| <b>British Columbia</b>          |        |        |        |         |         |                         |
| Loss                             |        |        |        |         |         |                         |
| Unexplained                      | 4,862  | 1,077  | 2,899  | 12,290  | 2,849   | 5,882                   |
| Pilferage                        | 3,340  | 16,496 | 12,318 | 1,051   | 1,733   | 2,112                   |
| <b>Alberta</b>                   |        |        |        |         |         |                         |
| Loss                             |        |        |        |         |         |                         |
| Unexplained                      | 4,368  | 9,934  | 6,420  | 9,239   | 3,027   | 4,575                   |
| Pilferage                        | 392    | 20     | -      | 105     | 205     | -                       |
| <b>Newfoundland and Labrador</b> |        |        |        |         |         |                         |
| Loss                             |        |        |        |         |         |                         |
| Unexplained                      | 2,901  | 424    | 573    | 160     | 82      | 25,038                  |
| Pilferage                        | -      | -      | -      | -       | -       | -                       |
| <b>Saskatchewan</b>              |        |        |        |         |         |                         |

Appendix for “Opioid losses in terms of dosage and cost: a retrospective analysis of Health Canada data”  
 Authors: Fan, Tscheng, Hamilton, Trbovich

|                              |       |      |       |       |        |       |
|------------------------------|-------|------|-------|-------|--------|-------|
| Loss                         |       |      |       |       |        |       |
| Unexplained                  | 317   | 441  | 4,088 | 3,208 | 19,142 | 217   |
| Pilferage                    | 239   | 19   | 1,200 | 3     | -      | -     |
| <b>Nova Scotia</b>           |       |      |       |       |        |       |
| Loss                         |       |      |       |       |        |       |
| Unexplained                  | 2,675 | 1071 | 44    | 331   | 32     | 4,060 |
| Pilferage                    | -     | 100  | -     | -     | -      | -     |
| <b>Nunavut</b>               |       |      |       |       |        |       |
| Loss                         |       |      |       |       |        |       |
| Unexplained                  |       | 4    | 50    | 2,760 |        |       |
| Pilferage                    | -     | -    | -     | -     | -      | -     |
| <b>New Brunswick</b>         |       |      |       |       |        |       |
| Loss                         |       |      |       |       |        |       |
| Unexplained                  | 187   | 568  | 55    | 47    | 6      | 1,132 |
| Pilferage                    | -     | 95   | -     | 242   | -      | 80    |
| <b>Northwest Territories</b> |       |      |       |       |        |       |
| Loss                         |       |      |       |       |        |       |
| Unexplained                  | -     | -    | 94    | 45    | 12     | 15    |
| Pilferage                    | -     | -    | -     | -     | -      | -     |
| <b>Yukon Territories</b>     |       |      |       |       |        |       |
| Loss                         |       |      |       |       |        |       |
| Unexplained                  | 130   | -    | -     | -     | -      | -     |
| Pilferage                    | -     | -    | -     | -     | -      | -     |

**Source:** Authors’ analysis of data for Jan. 2012 to Sept. 2017 from reports of Controlled Substances Loss or Theft Reports to Health Canada as published by CBC News in June 2018.

## 7. Line Graphs Comparing Opioid Loss Trends as Measured by Milligrams, Dosage Units, and Incidents of Loss

This section complements Table 4 in the article by providing a visual depiction of the loss trends from community pharmacies, companies, and hospitals. Specifically, loss trends appear to vary depending on the unit of measure. In Figures A1, A2, and A3 below, we show that depending on which measure is reported, readers may be inclined to believe that losses are increasing or decreasing when other measures show differing trends.

**\*\*Note,** the units of measure have been scaled so that the y-axis is comparable between the reporting metrics. Specifically the dosage units lost have been reduced by a factor of 100, and milligrams lost has

Appendix for "Opioid losses in terms of dosage and cost: a retrospective analysis of Health Canada data"  
 Authors: Fan, Tscheng, Hamilton, Trbovich

been divided by 1000 to provide losses in grams. These figures are primarily to demonstrate differences in trends, rather than a comparison of absolute values between the reporting metrics.

Figure A1.

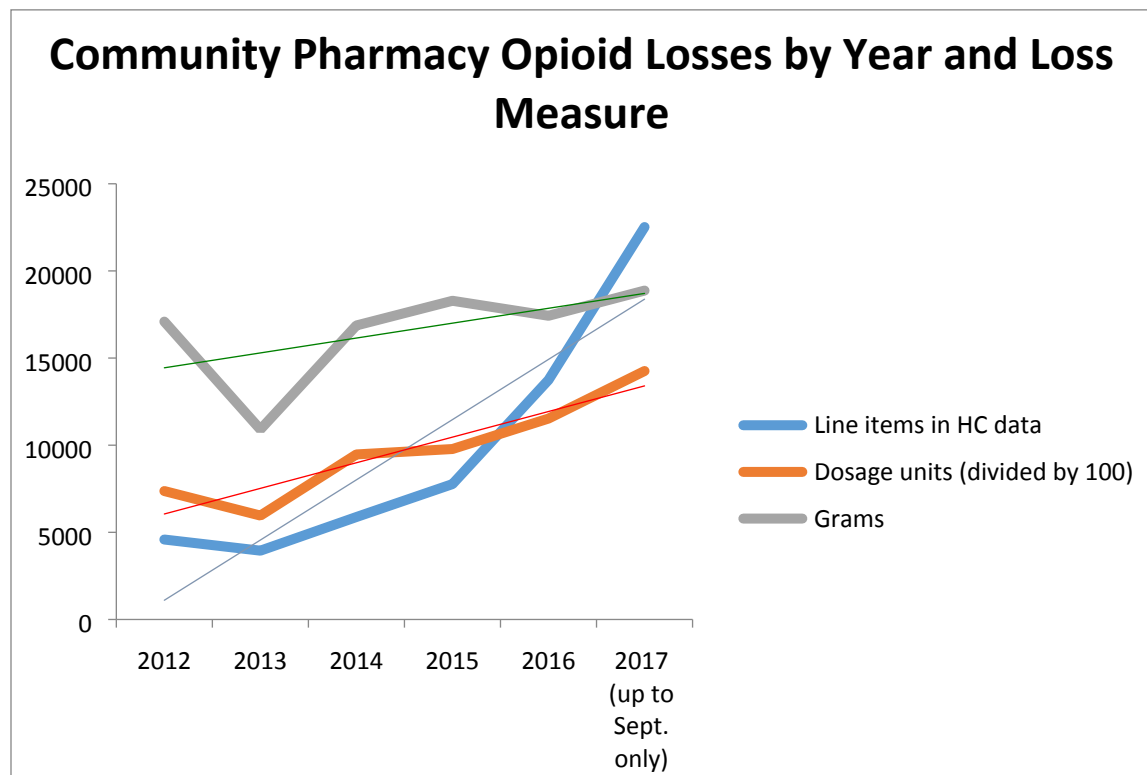

Figure A2.

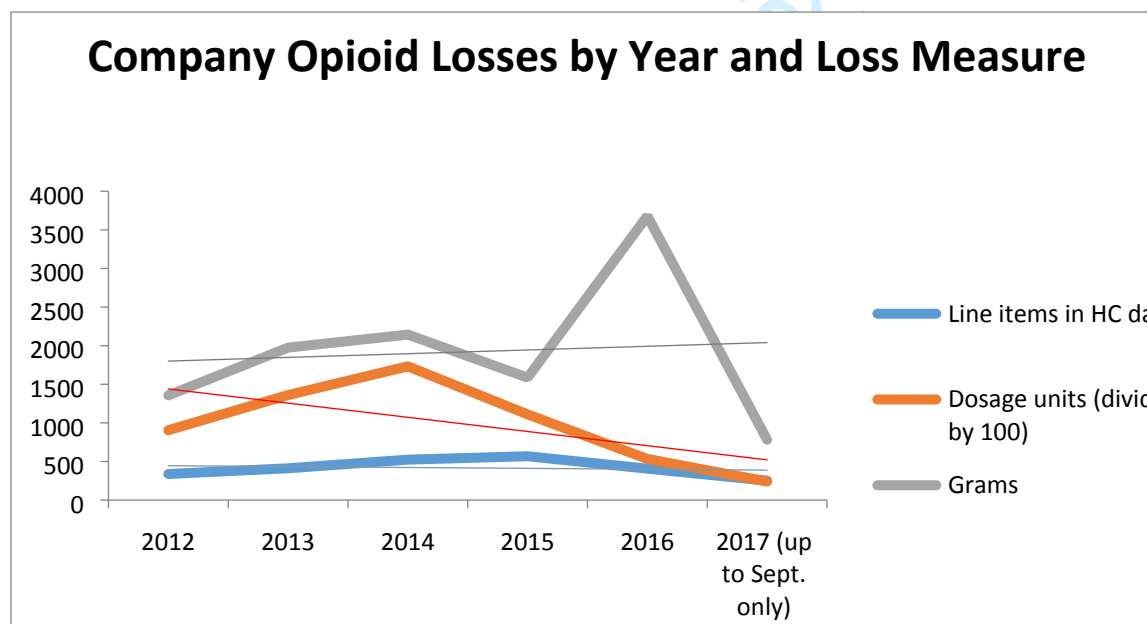

Appendix for “Opioid losses in terms of dosage and cost: a retrospective analysis of Health Canada data”  
 Authors: Fan, Tscheng, Hamilton, Trbovich

Figure A3.

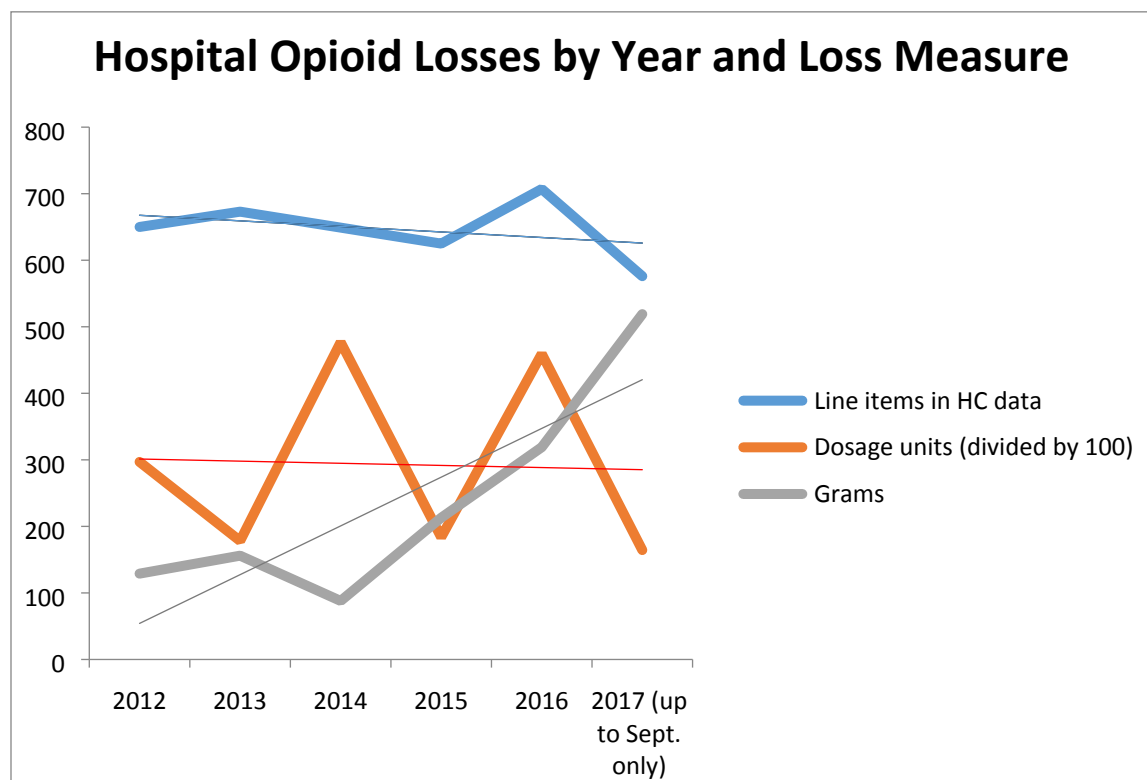

## 8. References for Appendix

1. Foxman S. Baseline Assessments Reveal Opportunities for Hospital Pharmacies. Pharm Connect [Internet]. 2016;23(1):8–33. Available from: <http://www.ocpinfo.com/library/practice-related/download/BaselineAssessmentsWinter2016.pdf>
2. Carman T. When prescription opioids run out, users look for the supply on the streets [Internet]. 2018. Available from: <https://www.cbc.ca/news/canada/when-prescription-opioids-run-out-users-look-for-the-supply-on-the-streets-1.4720952>
3. Carman T, Adhopia V. More than half a million prescription drugs are stolen each year - and most are opioids [Internet]. CBC News; 2018. Available from: <https://www.cbc.ca/news/canada/missing-drugs-pharmacies-part1-1.4708041>
4. Carman T. Analysis of Health Canada missing controlled substances and precursors data, Jan. 1, 2012 - Sept. 30, 2017 [dataset] [Internet]. 2018. Available from: [https://github.com/taracarman/drug\\_losses](https://github.com/taracarman/drug_losses)
5. Canadian Institute for Health Information. Pan-Canadian Trends in the Prescribing of Opioids and Benzodiazepines, 2012 to 2017 — Data Tables [Internet]. 2018. Available from: <https://www.cihi.ca/sites/default/files/document/pan-canadian-prescribed-opioid-benzo-data-tables-june18-en-web.xlsx>

Appendix for "Opioid losses in terms of dosage and cost: a retrospective analysis of Health Canada data"  
Authors: Fan, Tscheng, Hamilton, Trbovich

6. Busse J. Appendix 1 (as supplied by the authors): The 2017 Canadian guideline for opioids for chronic non-cancer pain [Internet]. 2017. Available from: <http://nationalpaincentre.mcmaster.ca/documents/Opioid>
7. Nielsen S, Degenhardt L, Hoban B, Gisev N. A synthesis of oral morphine equivalents (OME) for opioid utilisation studies. *Pharmacoepidemiol Drug Saf* [Internet]. 2016 Jun;25(6):733–7. Available from: <http://doi.wiley.com/10.1002/pds.3945>
8. National Center for Injury Prevention and Control. CDC compilation of benzodiazepines, muscle relaxants, stimulants, zolpidem, and opioid analgesics with oral morphine milligram equivalent conversion factors, 2018 version [dataset] [Internet]. Atlanta, Georgia: Centers for Disease Control and Prevention; 2018. Available from: [https://www.cdc.gov/drugoverdose/data-files/CDC\\_Oral\\_Morphine\\_Milligram\\_Equivalents\\_Sept\\_2018.xlsx](https://www.cdc.gov/drugoverdose/data-files/CDC_Oral_Morphine_Milligram_Equivalents_Sept_2018.xlsx)
9. Wiffen PJ, Wee B, Moore RA. Oral morphine for cancer pain. *Cochrane database Syst Rev* [Internet]. 2016 Apr 22;4:CD003868. Available from: <http://www.ncbi.nlm.nih.gov/pubmed/27105021>
10. Bruera E, Fainsinger R, Spachynski K, Babul N, Harsanyi Z, Darke AC. Clinical efficacy and safety of a novel controlled-release morphine suppository and subcutaneous morphine in cancer pain: a randomized evaluation. *J Clin Oncol* [Internet]. 1995 Jun;13(6):1520–7. Available from: <http://www.ncbi.nlm.nih.gov/pubmed/7751901>
11. Mercadante S, Arcuri E, Fusco F, Tirelli W, Villari P, Bussolino C, et al. Randomized double-blind, double-dummy crossover clinical trial of oral tramadol versus rectal tramadol administration in opioid-naive cancer patients with pain. *Support Care Cancer* [Internet]. 2005 Sep;13(9):702–7. Available from: <http://www.ncbi.nlm.nih.gov/pubmed/15645186>
12. International Narcotics Control Board. *Narcotic Drugs 2018 estimated World Requirements for 2019*. New York, New York; 2019.
13. World Health Organization Collaborating Centre for Drug Statistics Methodology. *ATC/DDD Index 2019* [Internet]. 2018 [cited 2019 May 9]. Available from: [https://www.whocc.no/atc\\_ddd\\_index/](https://www.whocc.no/atc_ddd_index/)
14. Lebin JA, Murphy DL, Severtson SG, Bau GE, Dasgupta N, Dart RC. Scoring the best deal: Quantity discounts and street price variation of diverted oxycodone and oxymorphone. *Pharmacoepidemiol Drug Saf* [Internet]. 2019;28(1):25–30. Available from: <http://dx.doi.org/10.1002/pds.4558>
15. Dasgupta N, Freifeld C, Brownstein JS, Menone CM, Surratt HL, Poppish L, et al. Crowdsourcing black market prices for prescription opioids. *J Med Internet Res* [Internet]. 2013;15(8):e178. Available from: <http://dx.doi.org/10.2196/jmir.2810>
16. Sajan A, Corneil T, Grzybowski S. The street value of prescription drugs. *CMAJ* [Internet]. 1998 Jul 28;159(2):139–42. Available from: <papers2://publication/uuid/966333E5-EDCA-4618-86CB-01C1BA13F254>
17. Drug Enforcement Administration; *Counterfeit Prescription Pills Containing Fentanyl: A Global Threat*. 2016.

Appendix for “Opioid losses in terms of dosage and cost: a retrospective analysis of Health Canada data”  
Authors: Fan, Tscheng, Hamilton, Trbovich

18. Bonnie RJ, Ford MA, Phillips JK, editors. Pain Management and the Opioid Epidemic [Internet]. Washington, D.C.: National Academies Press; 2017. Available from: <https://www.nap.edu/catalog/24781>

19. Newfoundland & Labrador Statistics Agency. Annual Estimates of Population for Canada, Provinces and Territories, from July 1, 1971 to July 1, 2017 [Internet]. 2017. p. 1. Available from: [https://www.stats.gov.nl.ca/statistics/Population/PDF/Annual\\_Pop\\_Prov.PDF](https://www.stats.gov.nl.ca/statistics/Population/PDF/Annual_Pop_Prov.PDF)

Confidential
